# Supplementary material for: Классификация стран по основным показателям развития алмазного рынка
Source: MDPI journal article supplement (doi:10.3390/biomedicines11061711), 2012-01-01

# A Novel MDM2 Binding Chalcone Induces Apoptosis of Oral Squamous Cell Carcinoma

Guilherme Freimann Wermelinger<sup>1,†</sup>, Lucas Rubini<sup>1,†</sup>, Anna Carolina Carvalho da Fonseca<sup>2</sup>, Gabriel Ouverney<sup>3</sup>, Rafael P. R. F. de Oliveira<sup>4</sup>, Acácio S. de Souza<sup>4</sup>, Luana S. M. Forezi<sup>4</sup>, Gabriel Limaverde Sousa<sup>5</sup>, Sergio Pinheiro<sup>4,\*</sup> and Bruno K. Robbs<sup>1,\*</sup>

<sup>1</sup> Basic Science Department, Health Institute of Nova Friburgo, Fluminense Federal University, Nova Friburgo, Brazil.

<sup>2</sup> Postgraduate Program in Dentistry, Health Institute of Nova Friburgo, Fluminense Federal University, Nova Friburgo, Brazil.

<sup>3</sup> Postgraduate Program in Applied Science for Health Products, Faculty of Pharmacy, Fluminense Federal University, Niteroi, Brazil.

<sup>4</sup> Department of Organic Chemistry, Chemistry Institute, Fluminense Federal University, Niteroi, Brazil.

<sup>5</sup> Experimental Schistosomiasis Laboratory, Oswaldo Cruz Institute, Oswaldo Cruz Foundation, FIOCRUZ, Rio de Janeiro, RJ, Brazil.

<sup>†</sup> These authors contributed equally to this work.

\*Correspondence:

Biological Assays: Bruno K. Robbs, Fluminense Federal University, Department of Basic Sciences, Nova Friburgo Health Institute, CEP 28625-650, Nova Friburgo-RJ, Brazil. Email: [brunokr@id.uff.br](mailto:brunokr@id.uff.br).

Chemistry: Sergio Pinheiro, Chemistry Institute, Federal Fluminense University, Outeiro de S. João Batista s/n, Centro, 24020-141 Niterói, RJ, Brazil; Email: [spinuff@gmail.com](mailto:spinuff@gmail.com)

**Keywords:** Chalcone, 1,2,3-Triazole; MDM2; Oral Squamous Cell Carcinoma; apoptosis; cell cycle arrest

**Supplementary Table S1: Compound shows low toxicity *in vivo*.** Occurrence of morbidity, mortality, gross organs necropsy and histology results of each treated group.

| Treatment | Dose<br>mg/kg <sup>a</sup> | Change<br>in body<br>weight | Morbidity <sup>b</sup> | Mortality | Gross Necropsy <sup>c</sup> |
|-----------|----------------------------|-----------------------------|------------------------|-----------|-----------------------------|
| Control   | 0<br>N=3                   | Normal                      | Normal                 | Absent    | Normal                      |
|           | 25<br>N=3                  | Absent                      | Absent                 | Absent    | No alteration               |
| 1f        | 50<br>N=3                  | Absent                      | Absent                 | Absent    | No alteration               |
|           | 100<br>N=3                 | Absent                      | Absent                 | Absent    | No alteration               |

<sup>a</sup> Dose level for each subsequent group was determined based on the result after the previous lower dosing, <sup>b</sup> Morbidity symptoms were analyzed every day, two times a day and were considered as: Tremors; Convulsion; Salivation; Diarrhea; Lethargy; Coma; Signs of Pain; Mobility defect, <sup>c</sup> Gross organ necropsy of liver, thymus, right kidney, right testicle, heart, major lymph nodes and lung.

**Supplementary Table S2:**

Interaction mapping using Discovery Studio. The most favorable conformation was determined by the lowest binding energy obtained on Autodock. The Mdm2 pocket is mainly hydrophobic, which can be seen by the interaction pattern present on Nutlin-3A.

| Ligant                               | Hydrogen bond         | C-H bond | Alkyl                                           | $\pi$ -Alkyl                                     | $\pi$ -Sigma | $\pi$ - $\pi$ stacked |
|--------------------------------------|-----------------------|----------|-------------------------------------------------|--------------------------------------------------|--------------|-----------------------|
| <b>1a</b><br>(-7.94 kcal/mol)        | GLN24, TYR100         | HIS96    | -                                               | LYS51, LEU54, VAL93, ILE99                       | LEU54, ILE99 | HIS96                 |
| <b>1b</b><br>(-8.37 kcal/mol)        | GLN24, TYR100         | -        | -                                               | LYS51, LEU54, VAL93, ILE99                       | LEU54, ILE99 | HIS96                 |
| <b>1c</b><br>(-8.28 kcal/mol)        | GLN24, TYR100         | -        | ILE61, VAL75, VAL93                             | LYS51, LEU54, VAL93, ILE99                       | LEU54, ILE99 | HIS96                 |
| <b>1f</b><br>(-9.18 kcal/mol)        | GLN24, TYR100, TYR100 | -        | LEU54, VAL93, ILE99                             | LYS51, LEU54, PHE91, ILE99, ILE99                | LEU54, LEU54 | -                     |
| <b>Nutlin-3A</b><br>(-9.52 kcal/mol) | -                     | -        | LEU54, LEU57, ILE61, VAL75, VAL93, ILE99, ILE99 | LEU54, ILE61, OHE91, VAL93, HIS96, ILE99, TYR100 | VAL93,       | -                     |

**Supplementary Table S3:** Physicochemical descriptors of new chalcone compounds, nutlin-3a and the reference chemotherapy drugs doxorubicin and carboplatin.

| SwissADME   | TPSA   | MW (< 500) | H-bond acceptor (<10) | H-bond donor (<5) | MLogP (<5) | Lipinski # of Violations |
|-------------|--------|------------|-----------------------|-------------------|------------|--------------------------|
| 1a          | 73.8   | 292.34     | 3                     | 1                 | 1.29       | 0                        |
| 1b          | 73.8   | 290.32     | 3                     | 1                 | 2.03       | 0                        |
| 1c          | 83.03  | 322.36     | 4                     | 1                 | 1.79       | 0                        |
| 1f          | 73.8   | 318.37     | 3                     | 1                 | 2.5        | 0                        |
| Nutlin-3a   | 83.14  | 583.51     | 5                     | 2                 | 3.94       | 1                        |
| Doxorubicin | 206.07 | 543.52     | 12                    | 6                 | -2.1       | 3                        |
| Carboplatin | 126.64 | 371.25     | 6                     | 4                 | -1.79      | 0                        |

<sup>a</sup> Number of violations to the Lipinski “rule of 5”: cLogP  $\leq$  5; MW, molecular weight  $\leq$  500; nON, number of hydrogen bond acceptors  $\leq$  10; and nOH/NH, number of hydrogen bond donors  $\leq$  5.

**Supplementary Table S4:** Predicted pharmacokinetic properties of chalcones, nutlin-3a and the chemotherapeutic agents, carboplatin and doxorubicin, using the admetSAR 2.0 server.

| ADMET       | Oral Bioavailability | P-glycoprotein inhibitor | P-glycoprotein substrate |
|-------------|----------------------|--------------------------|--------------------------|
| 1a          | + 0.76               | - 0.77                   | - 0.85                   |
| 1b          | + 0.71               | - 0.75                   | - 0.88                   |
| 1c          | + 0.67               | - 0.66                   | - 0.63                   |
| 1f          | + 0.67               | - 0.54                   | - 0.72                   |
| Nutlin-3a   | + 0.53               | + 0.90                   | + 0.82                   |
| Doxorubicin | - 0.91               | - 0.92                   | + 0.95                   |
| Carboplatin | - 0.60               | - 0.99                   | - 0.99                   |

### Compounds spectra

**Figure S1.** IR (KBr) of ethyl 4-(4-(hydroxymethyl)-1*H*-1,2,3-triazol-1-yl)benzoate

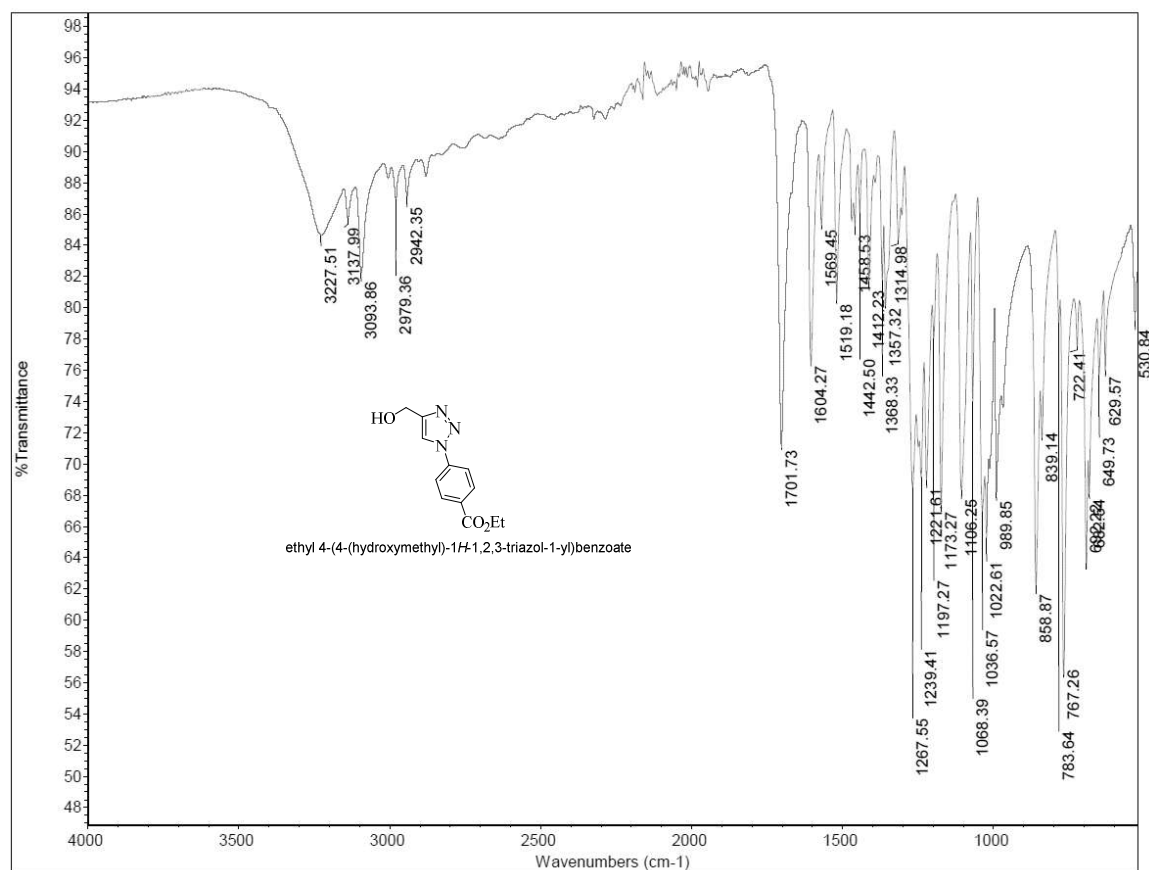

**Figure S2.**  $^1\text{H}$  NMR (500 MHz,  $\text{CDCl}_3$ ) of ethyl 4-(4-(hydroxymethyl)-1*H*-1,2,3-triazol-1-yl)benzoate

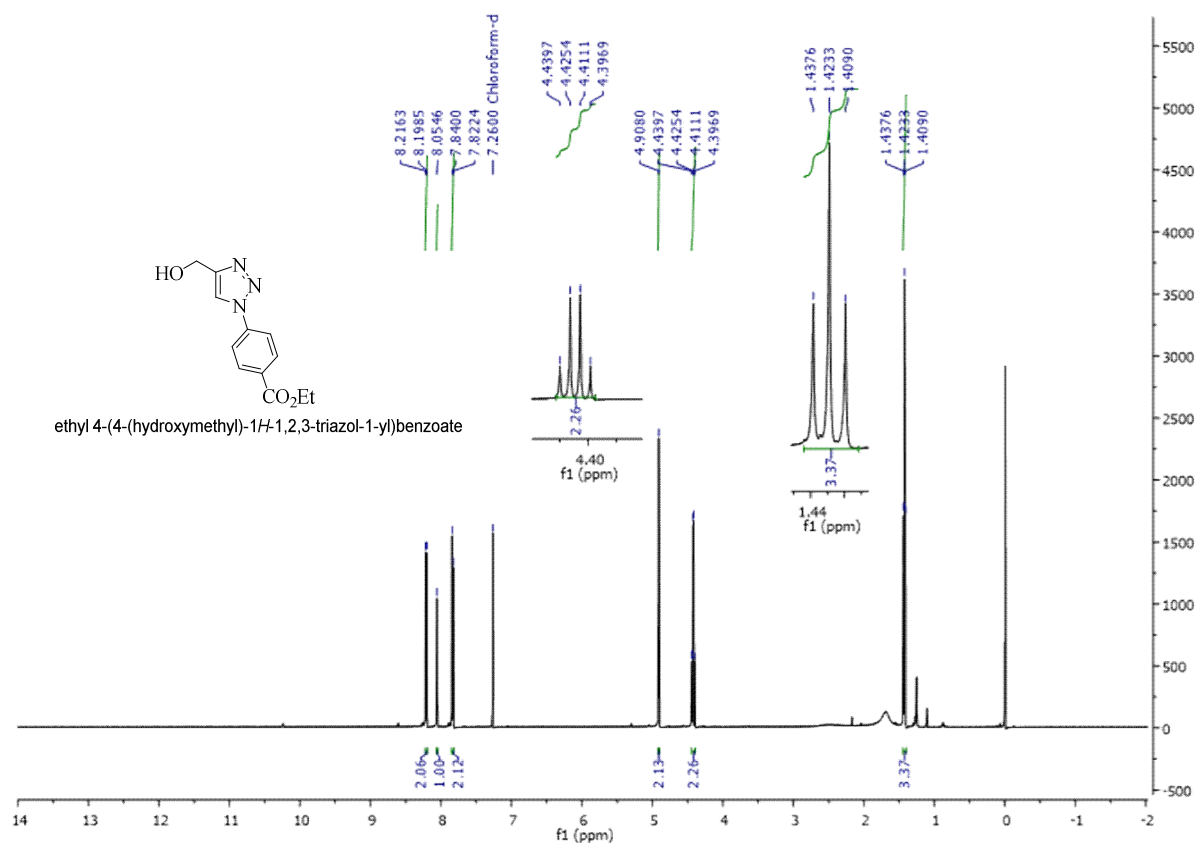

**Figure S3. Expanded  $^1\text{H}$  NMR (500 MHz,  $\text{CDCl}_3$ ) of ethyl 4-(4-(hydroxymethyl)-1*H*-1,2,3-triazol-1-yl)benzoate**

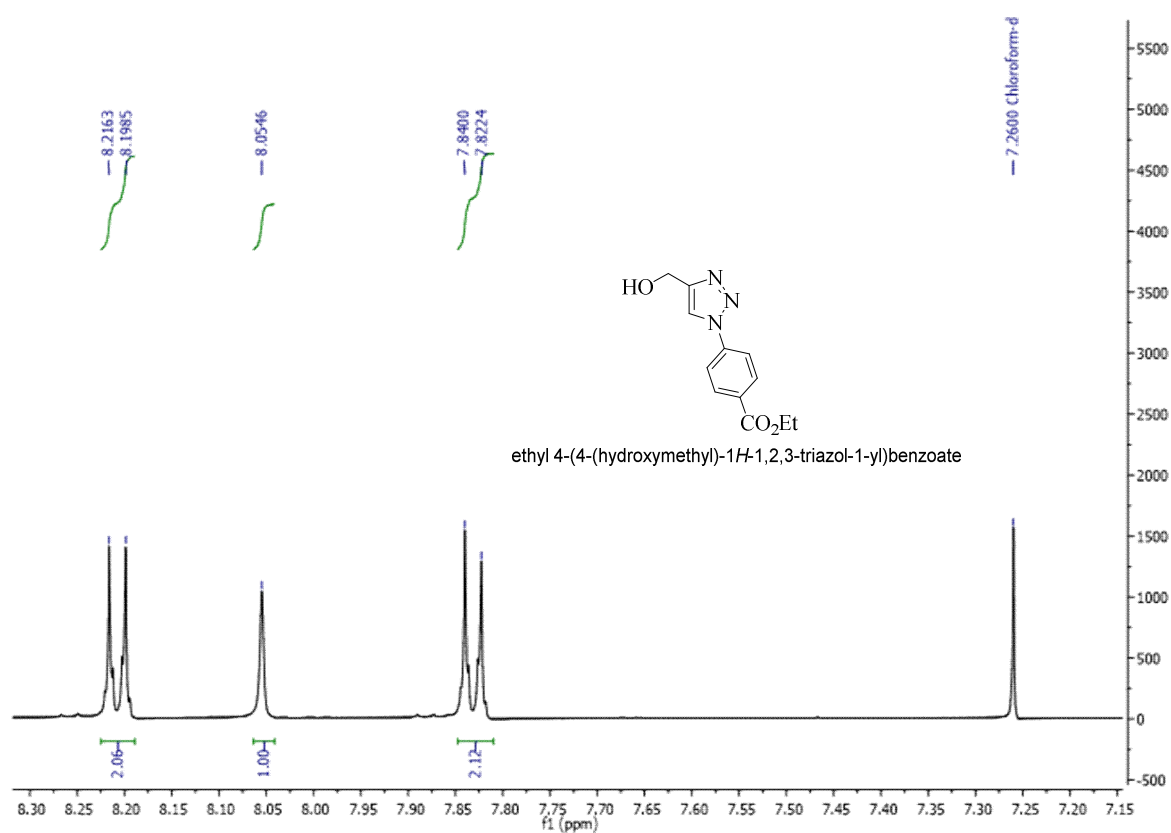

Figure S4. IR (neat) of (1-(2,6-dimethylphenyl)-1*H*-1,2,3-triazol-4-yl)methanol

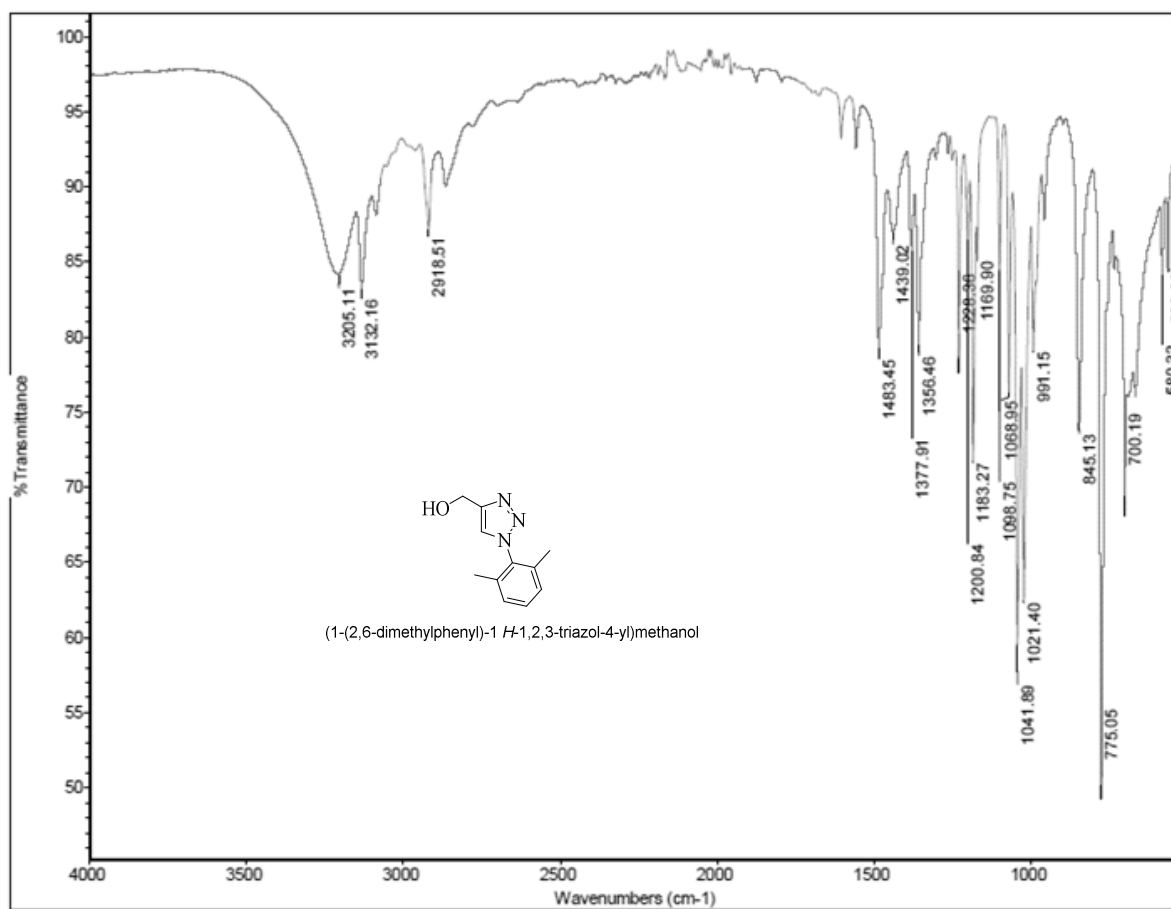

**Figure S5.  $^1\text{H}$  NMR (500 MHz, acetone- $d_6$ ) of (1-(2,6-dimethylphenyl)-1*H*-1,2,3-triazol-4-yl)methanol**

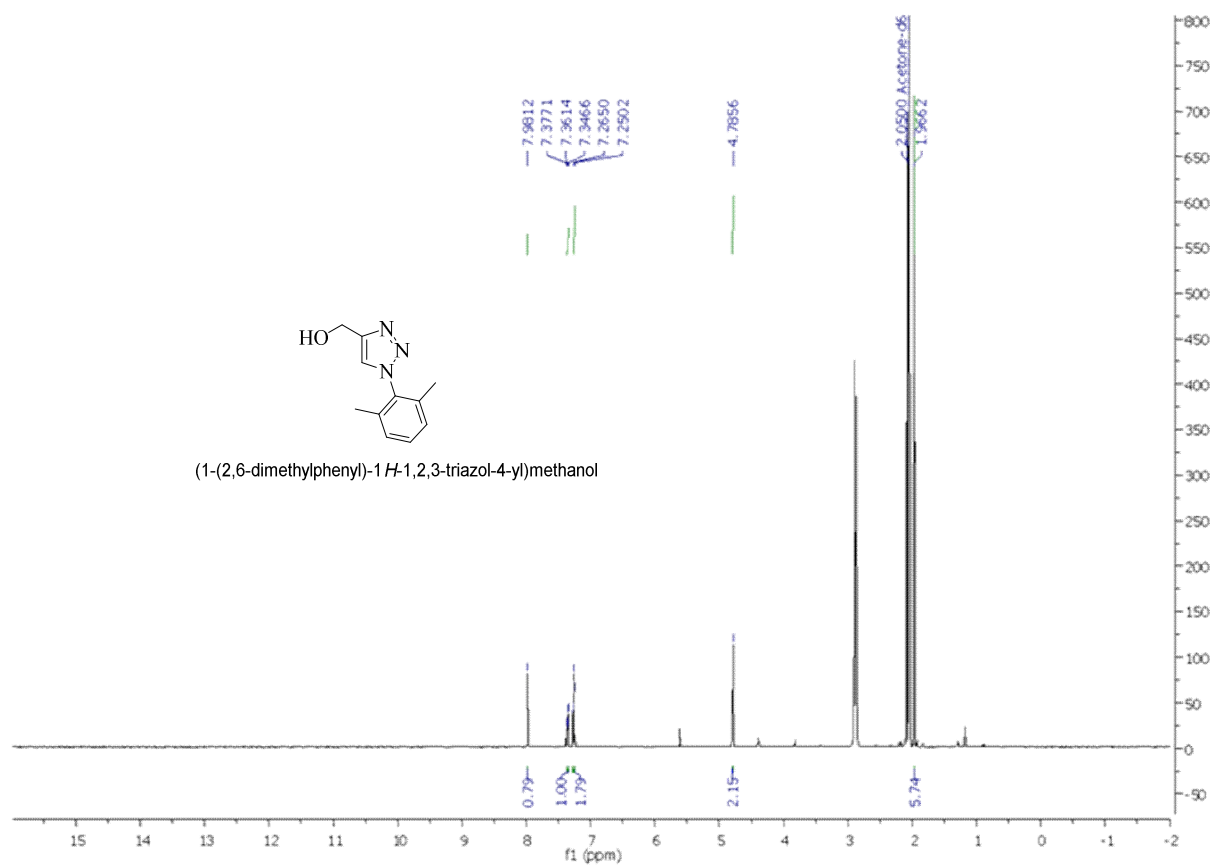



**Figure S6. Expanded  $^1\text{H}$  NMR (500 MHz, acetone- $d_6$ ) of (1-(2,6-dimethylphenyl)-1*H*-1,2,3-triazol-4-yl)methanol**

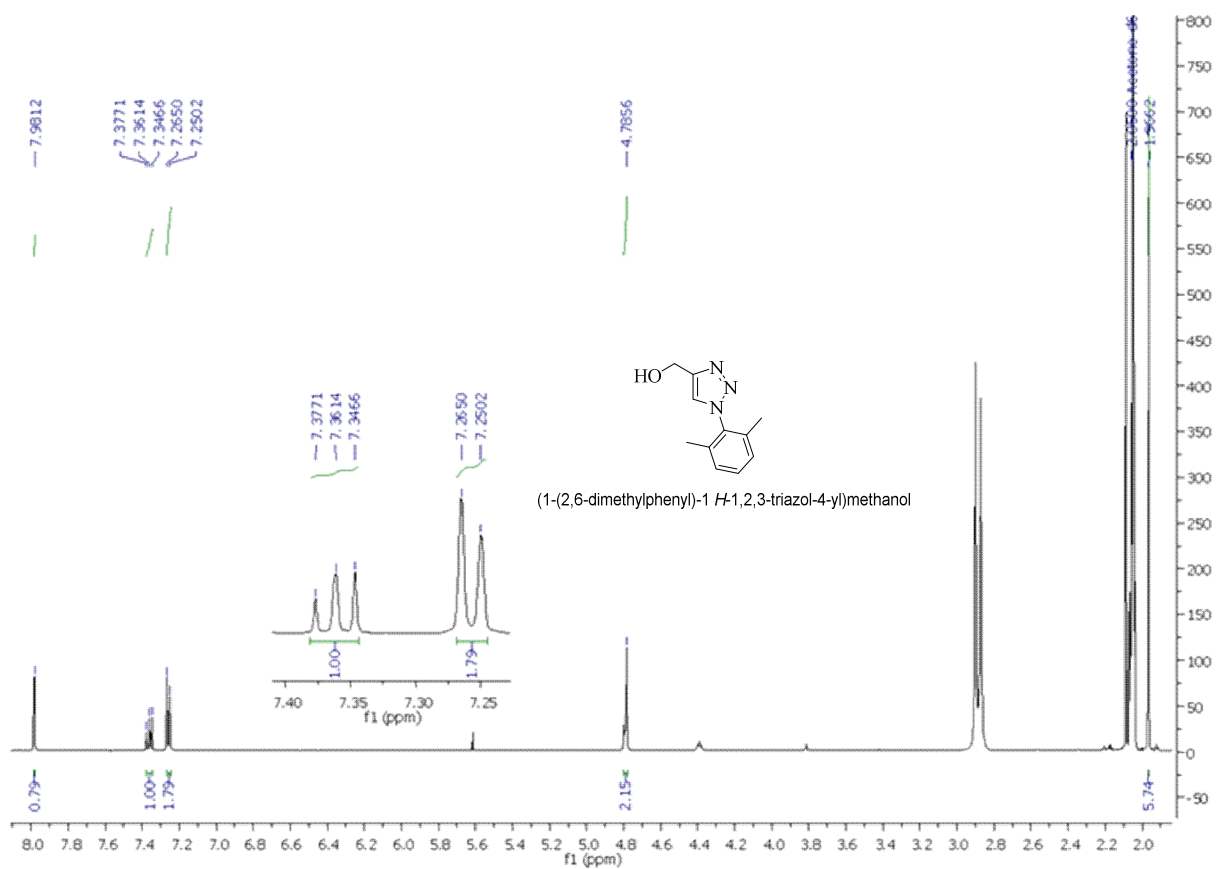

Figure S7. IR (KBr) of compound 2e

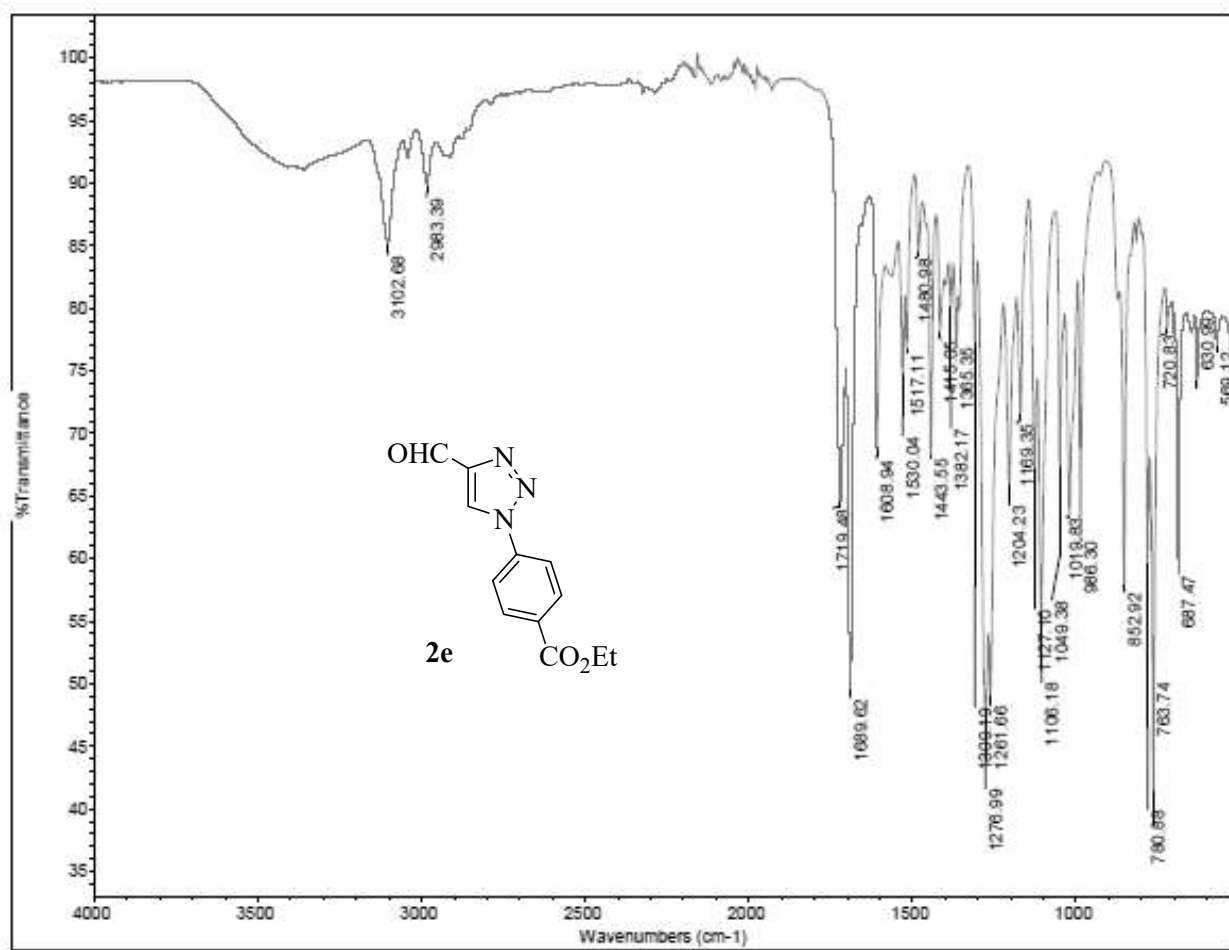

Figure S8.  $^1\text{H}$  NMR (500 MHz,  $\text{CDCl}_3$ ) of compound 2e

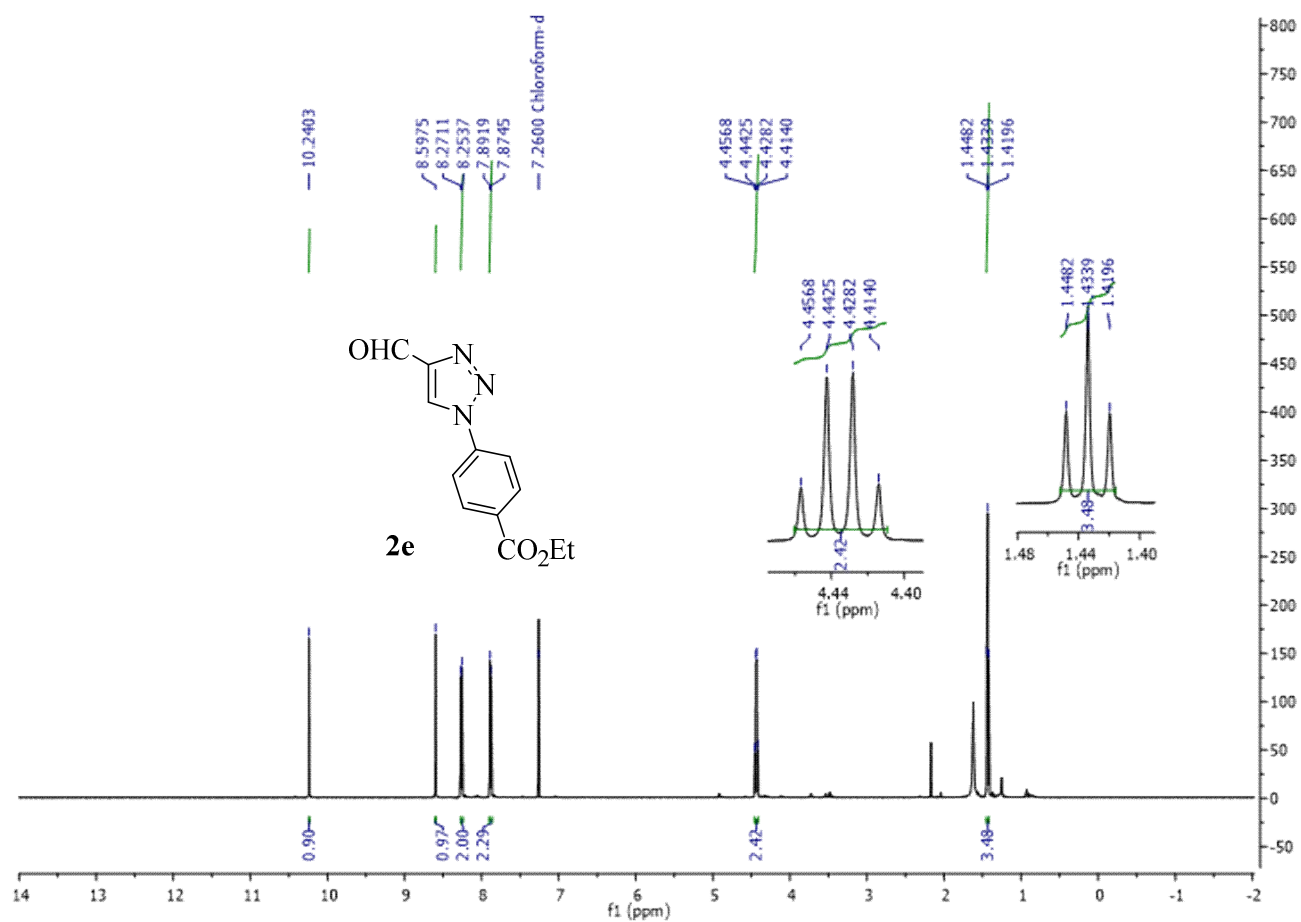

Figure S9. Expanded  $^1\text{H}$  NMR (500 MHz,  $\text{CDCl}_3$ ) of compound **2e**

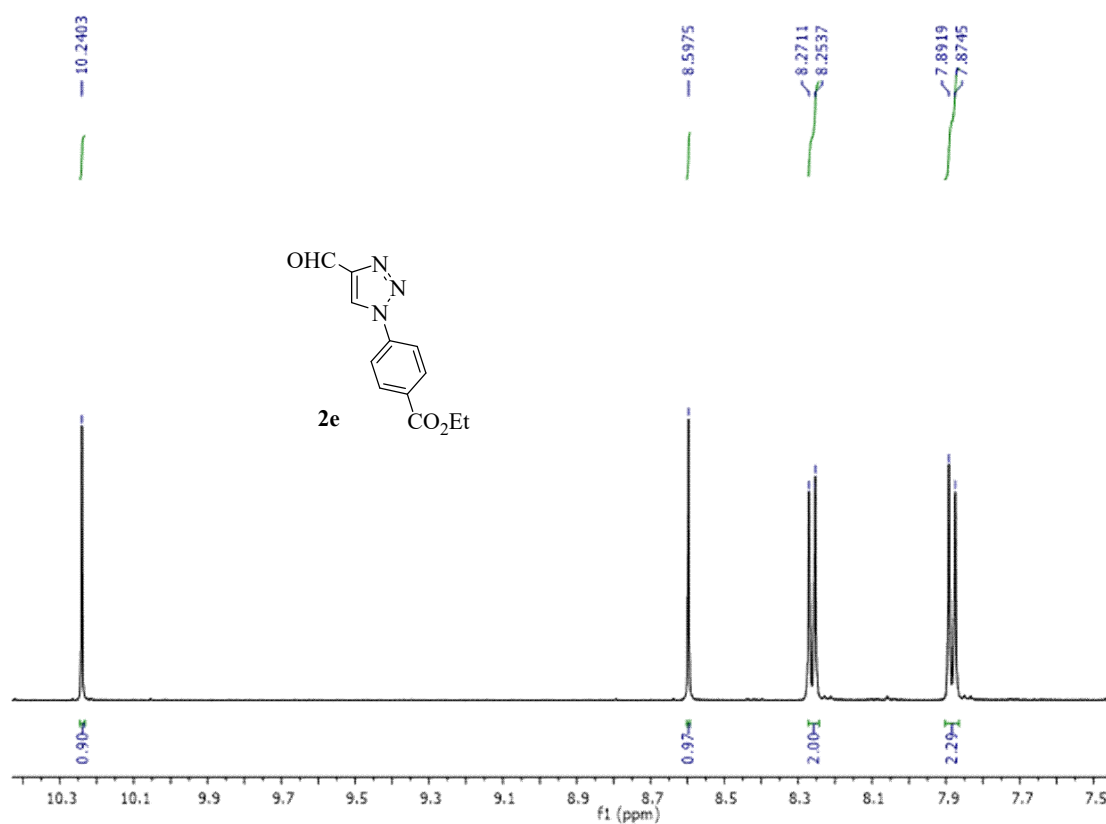

Figure S10. IR (KBr) of compound 2f

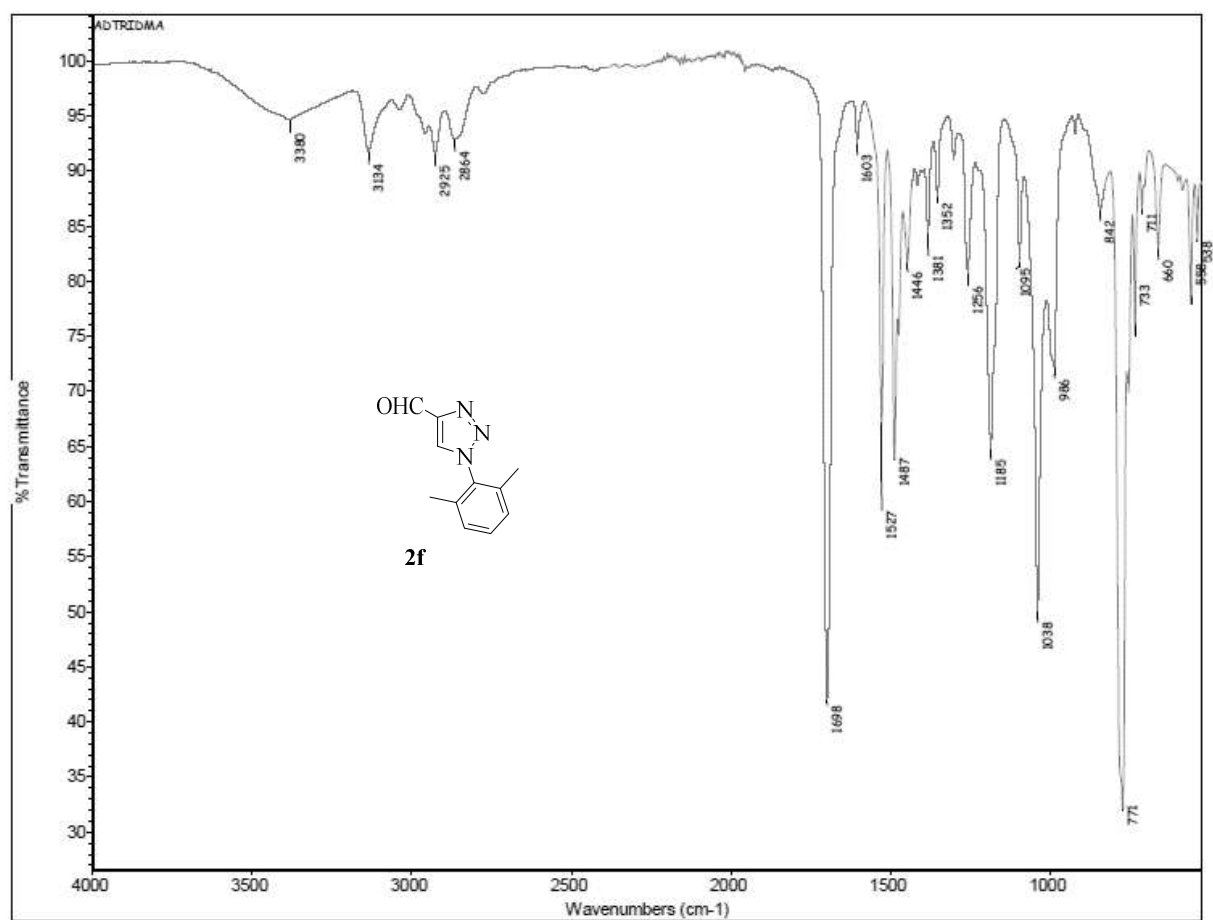

Figure S11.  $^1\text{H}$  NMR (500 MHz, acetone- $d_6$ ) of compound 2f

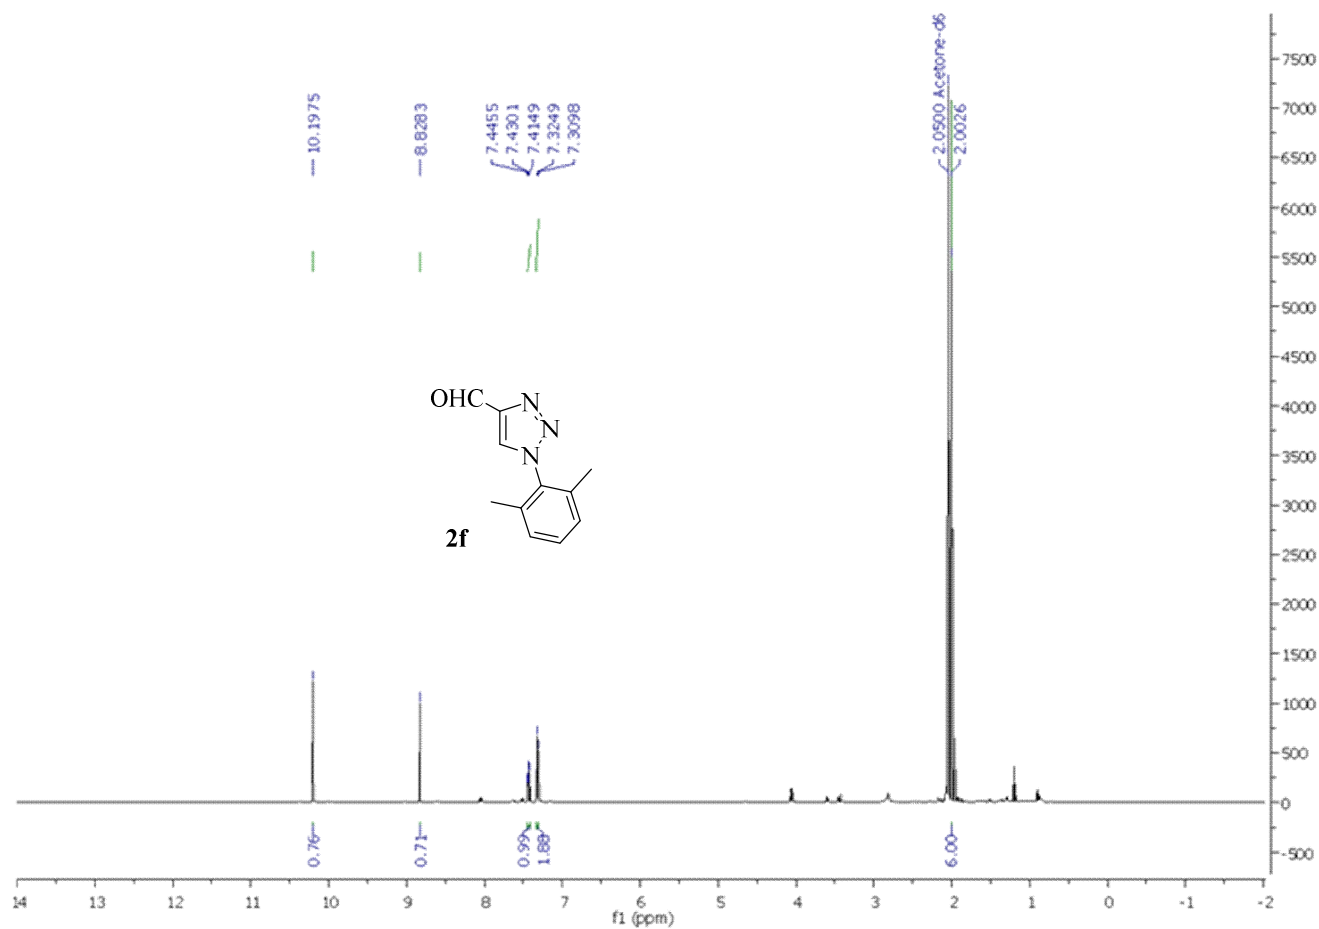

Figure S12. Expanded  $^1\text{H}$  NMR (500 MHz, acetone- $d_6$ ) of compound **2f**

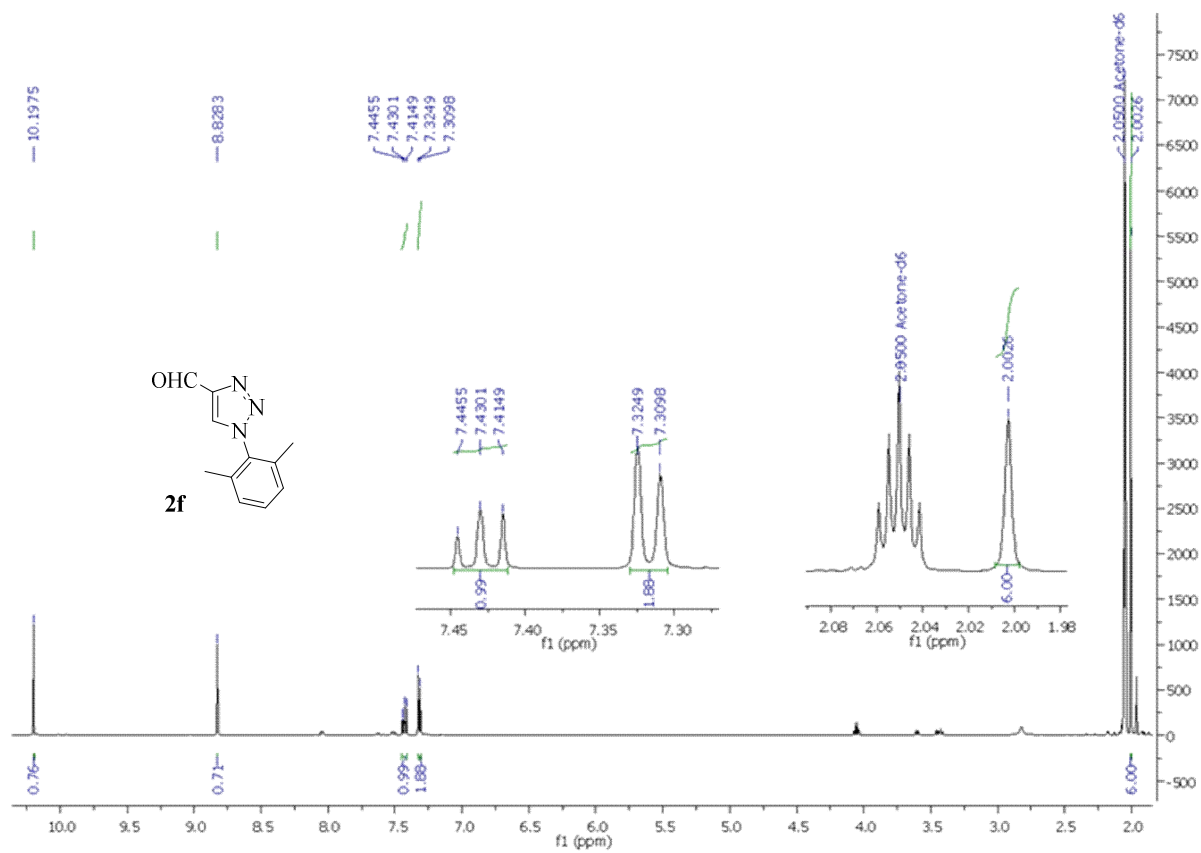

**Figure S13. IR (KBr) of compound 1a**

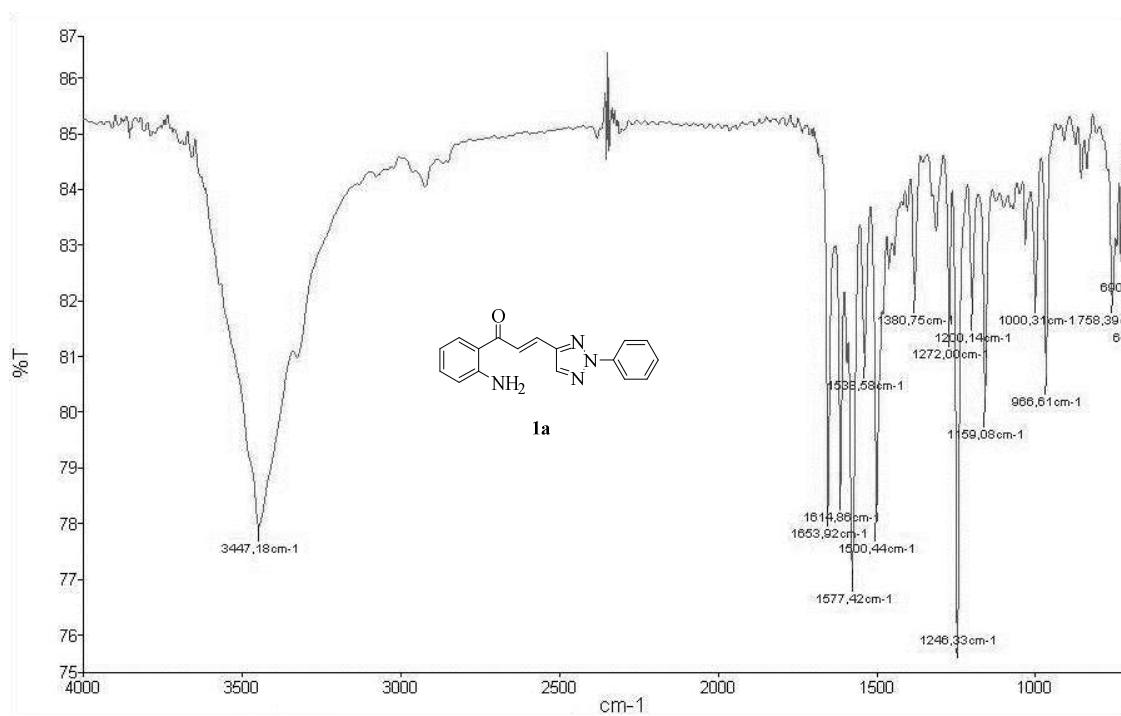



Figure S14. <sup>1</sup>H NMR (500 MHz, DMSO-d<sub>6</sub>) of compound 1a

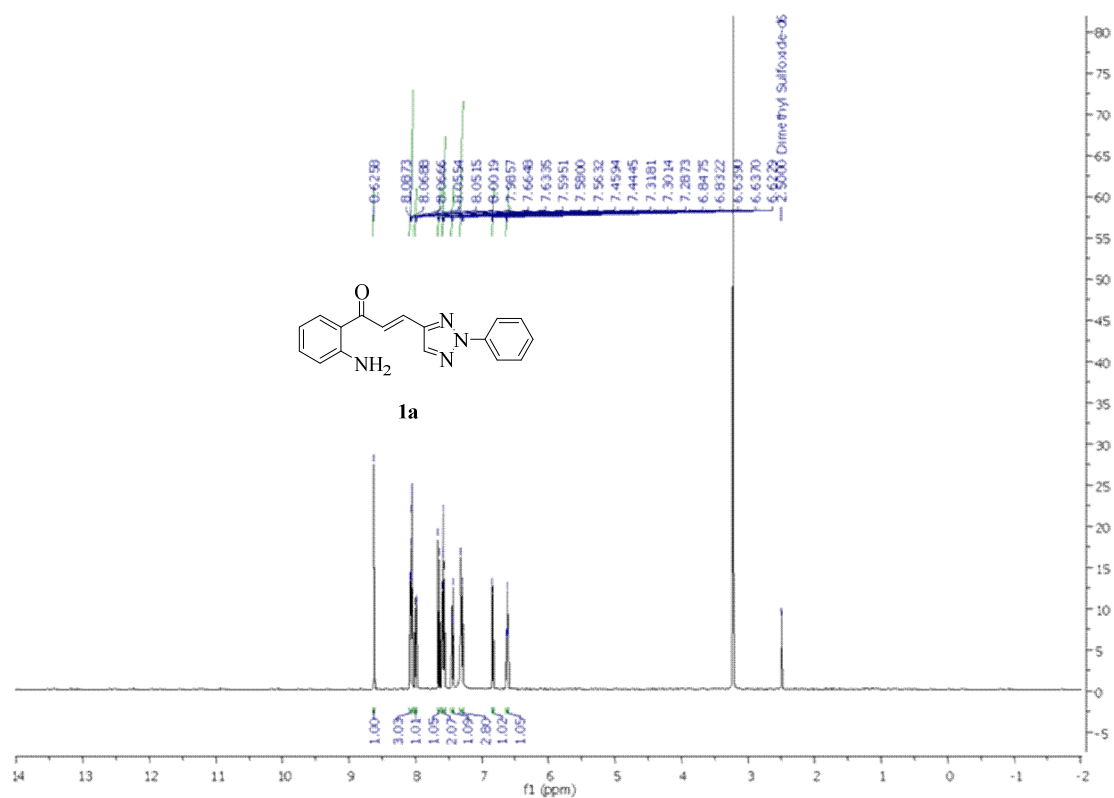

Figure S15. Expanded  $^1\text{H}$  NMR (500 MHz, DMSO- $d_6$ ) of compound **1a**

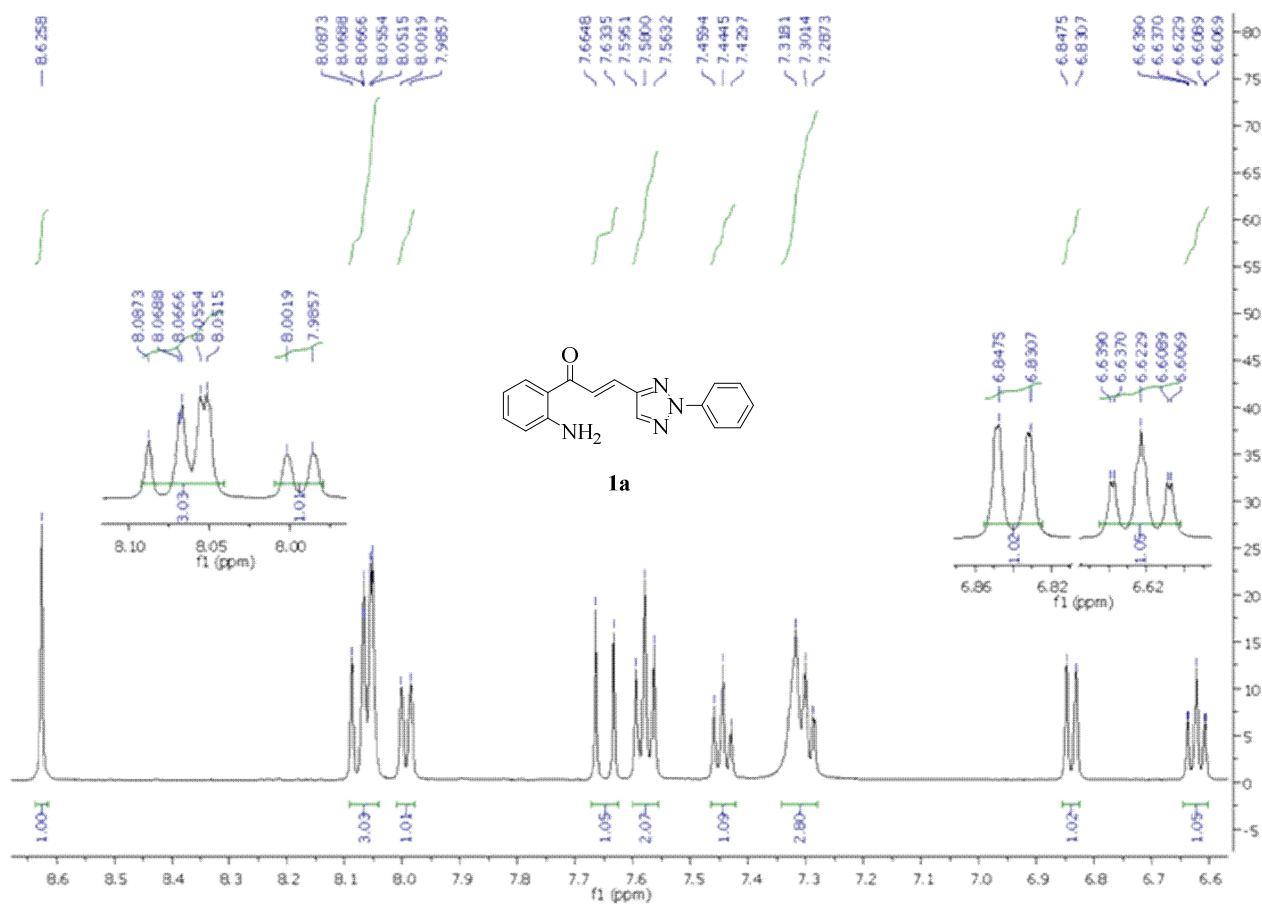

**Figure S16.**  $^{13}\text{C}$  NMR/APT (125 MHz, DMSO- $d_6$ ) of compound **1a**

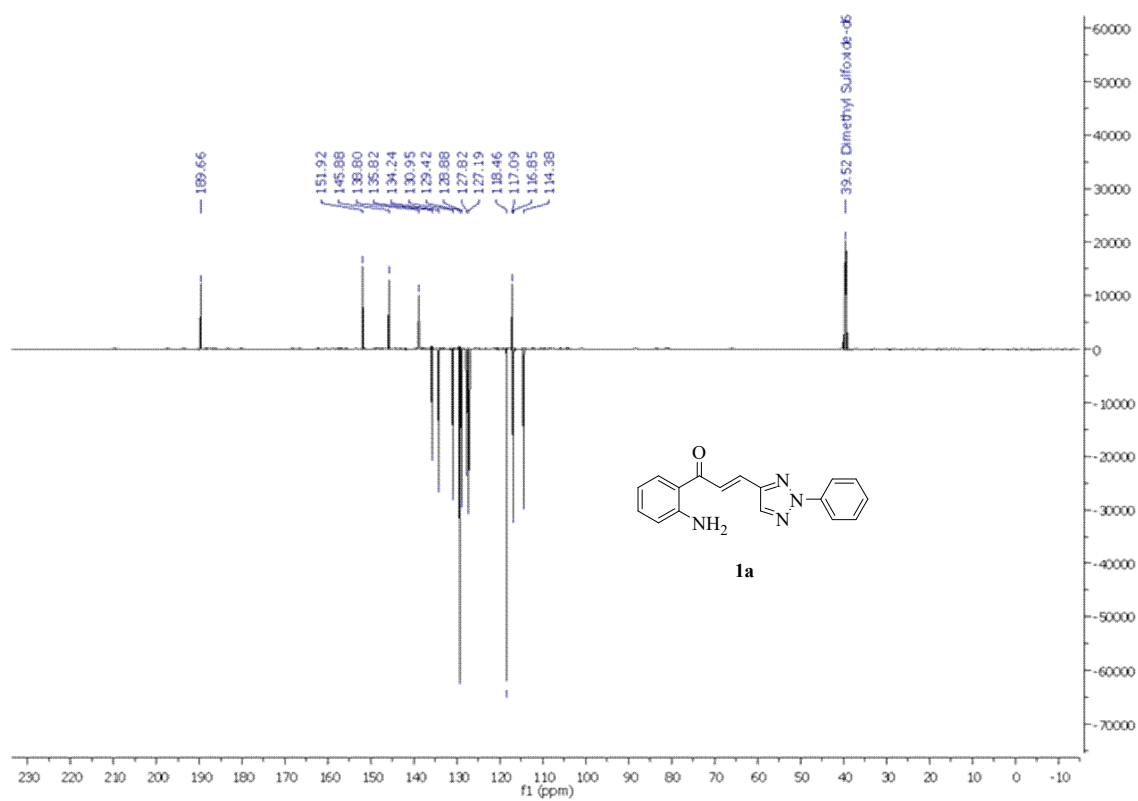

Figure S17. Expanded  $^{13}\text{C}$  NMR/APT (125 MHz, DMSO- $d_6$ ) of compound **1a**

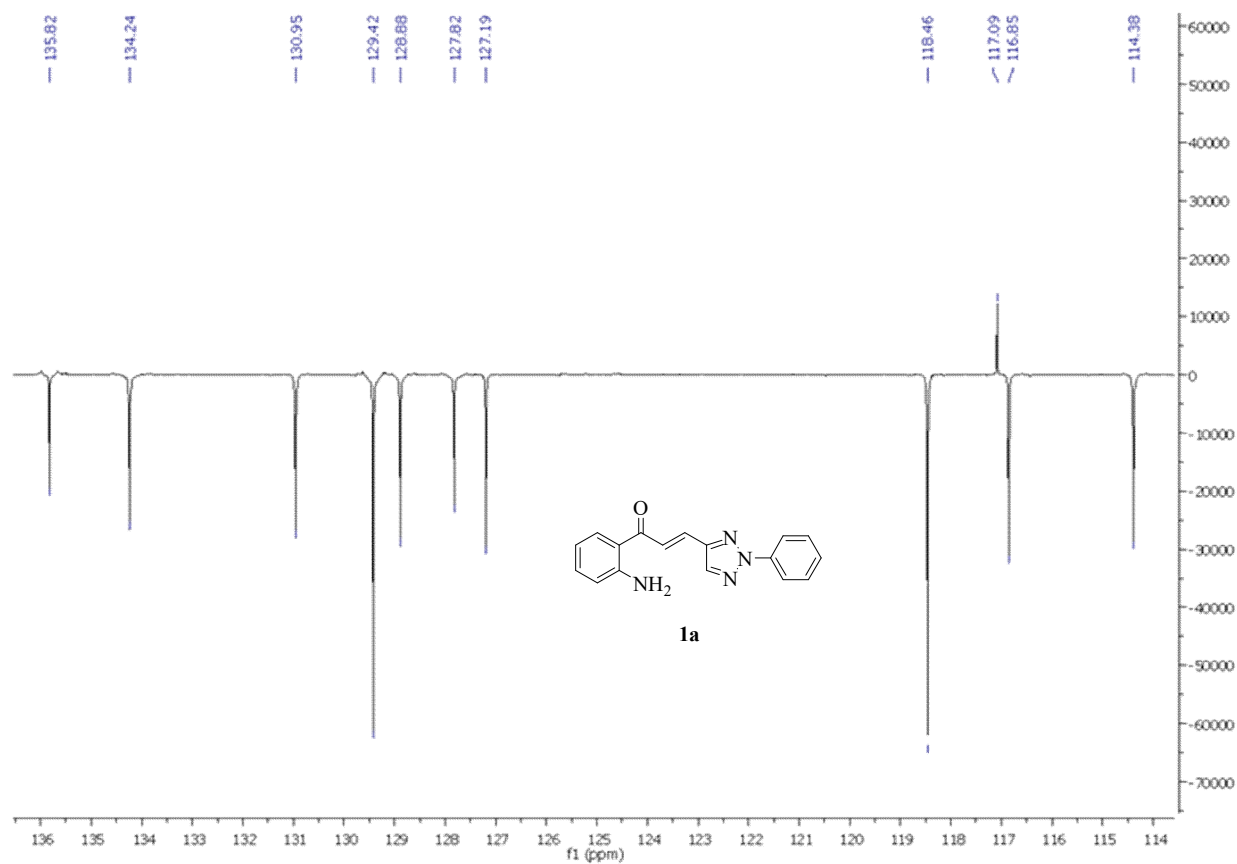

**Figure S18. HSQC (DMSO-d6) of compound 1a**

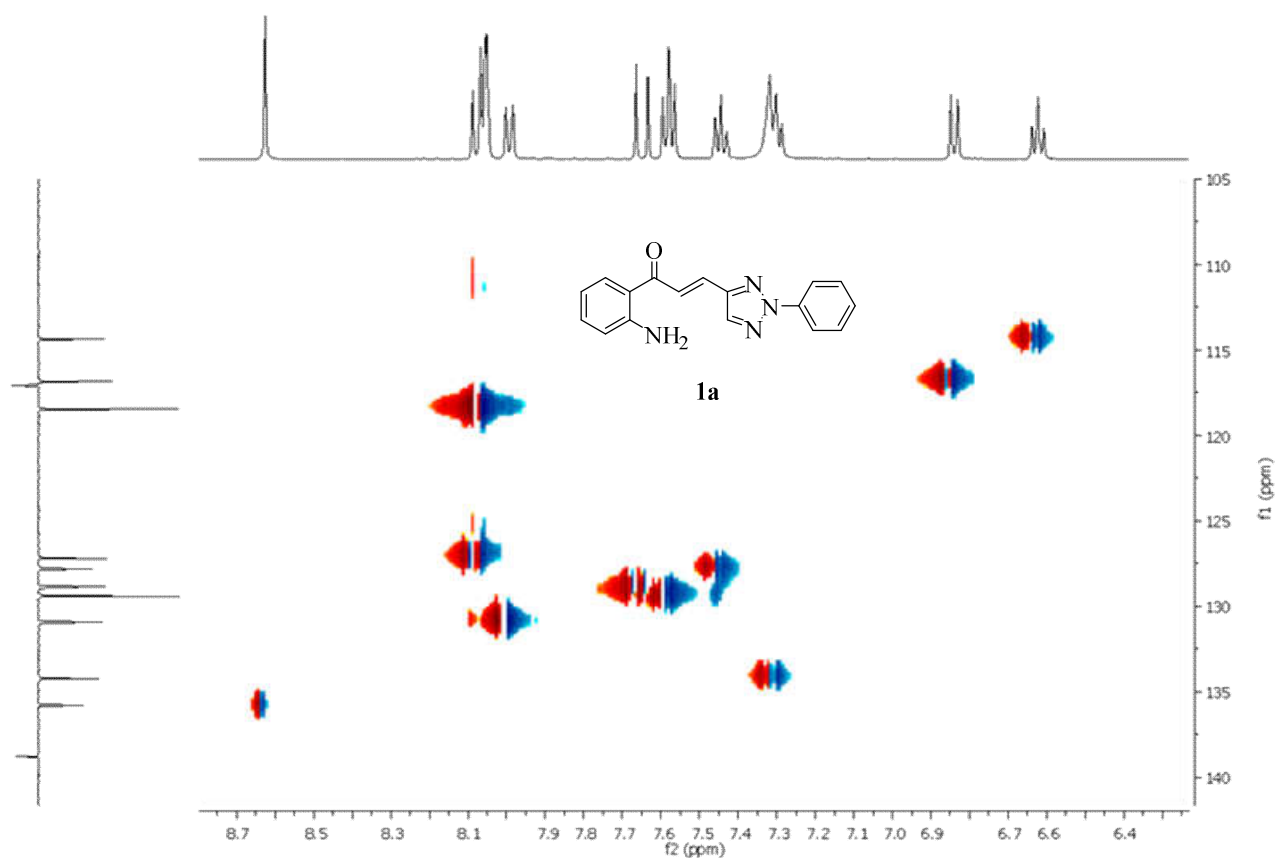

**Figure S19. Expanded HSQC (DMSO-d<sub>6</sub>) of compound 1a**

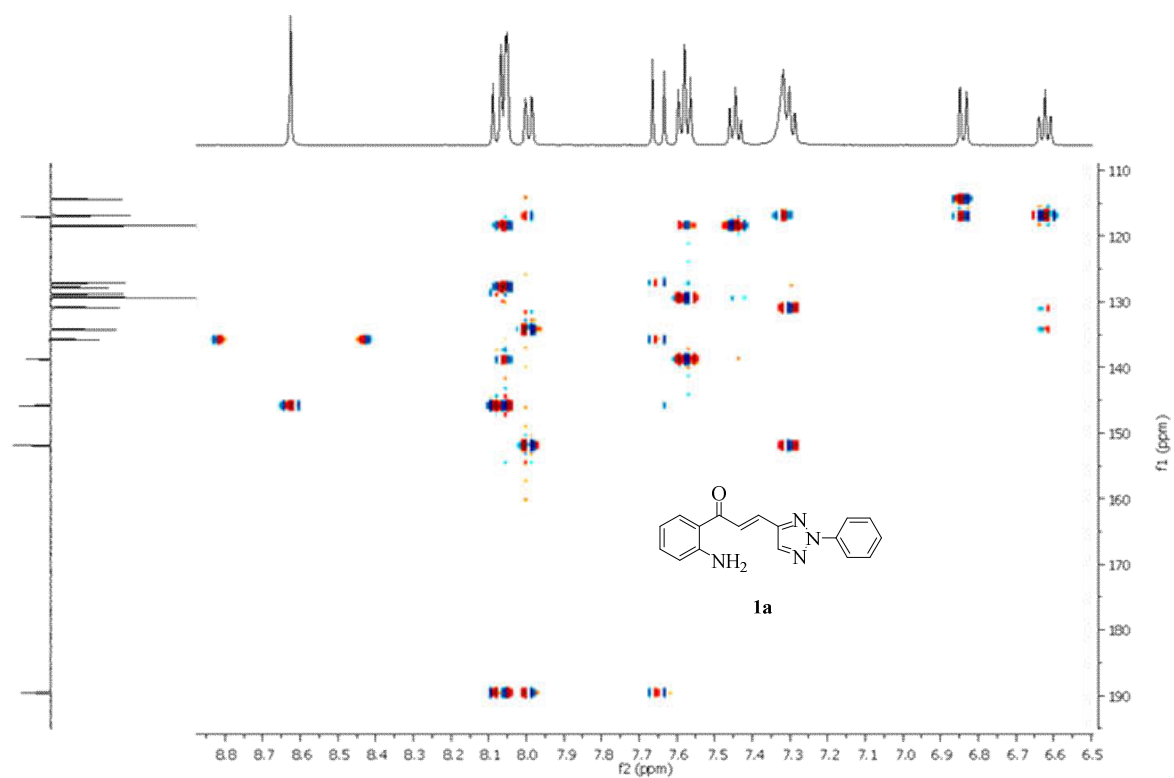

**Figure S20. Expanded HSQC (DMSO-d<sub>6</sub>) of compound 1a**

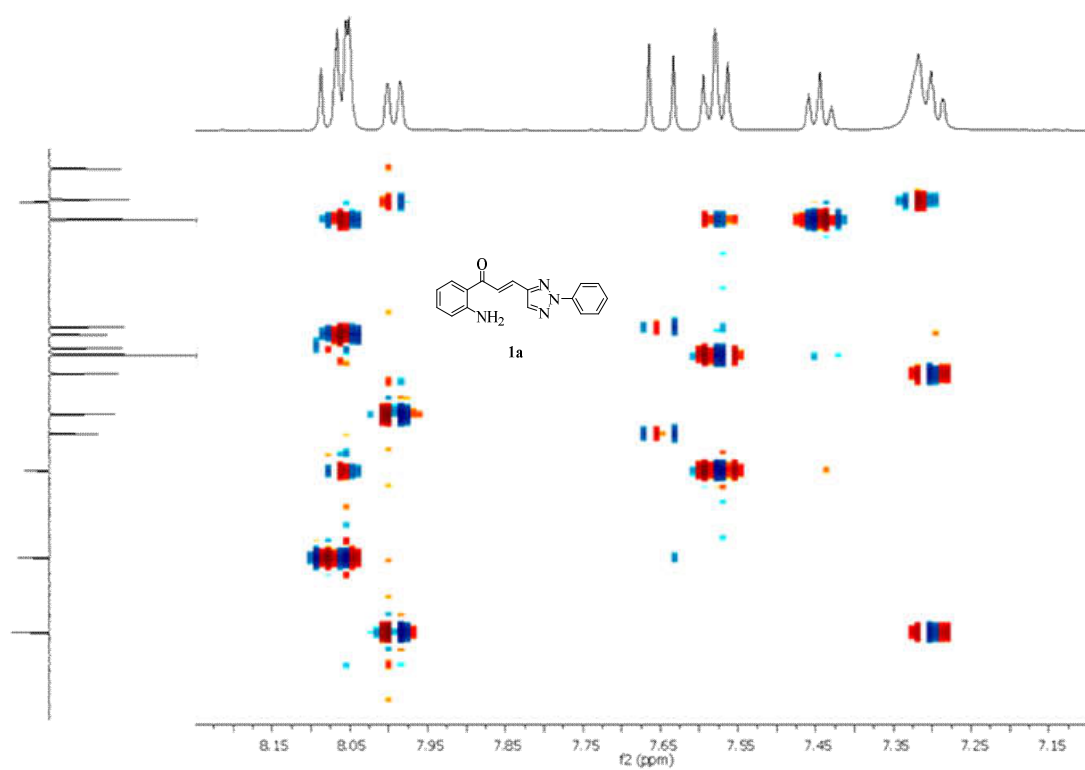

Figure S21. IR (KBr) of compound 1b

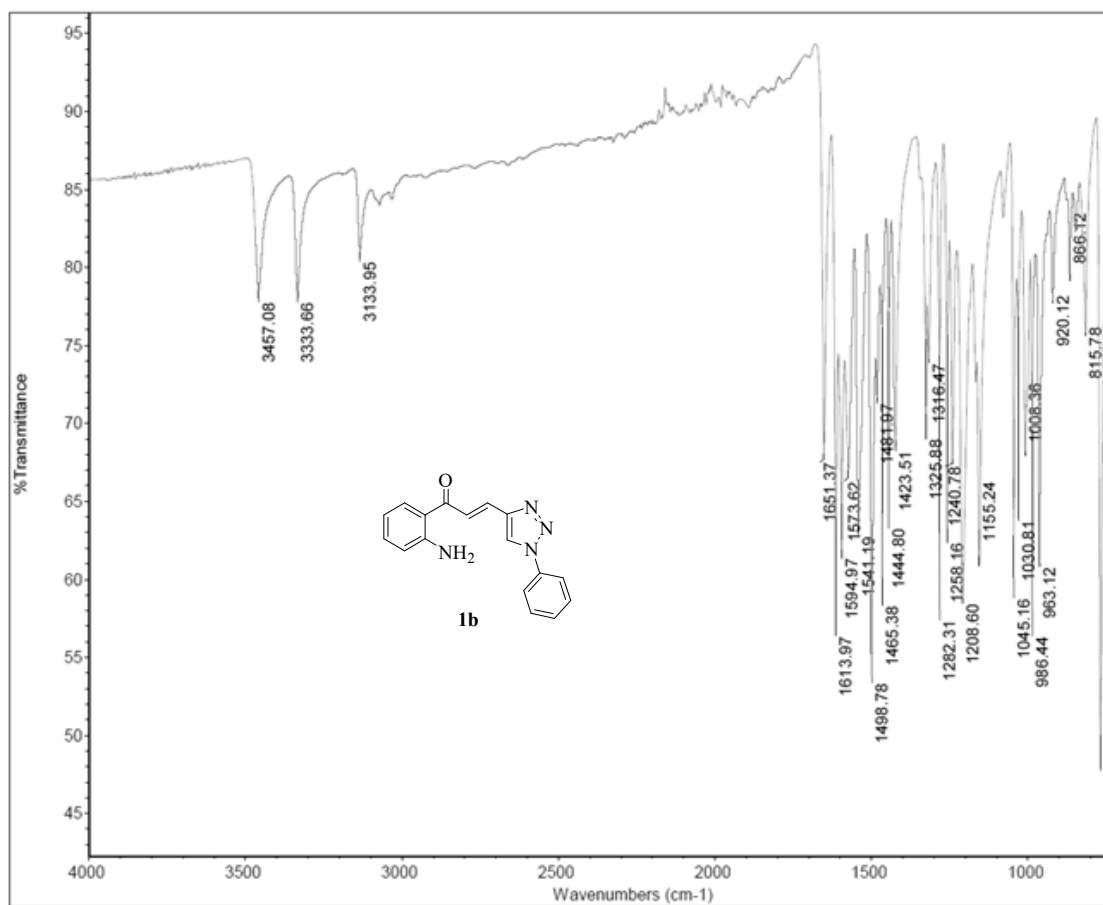



Figure S22.  $^1\text{H}$  NMR (300 MHz, DMSO- $d_6$ ) of compound **1b**

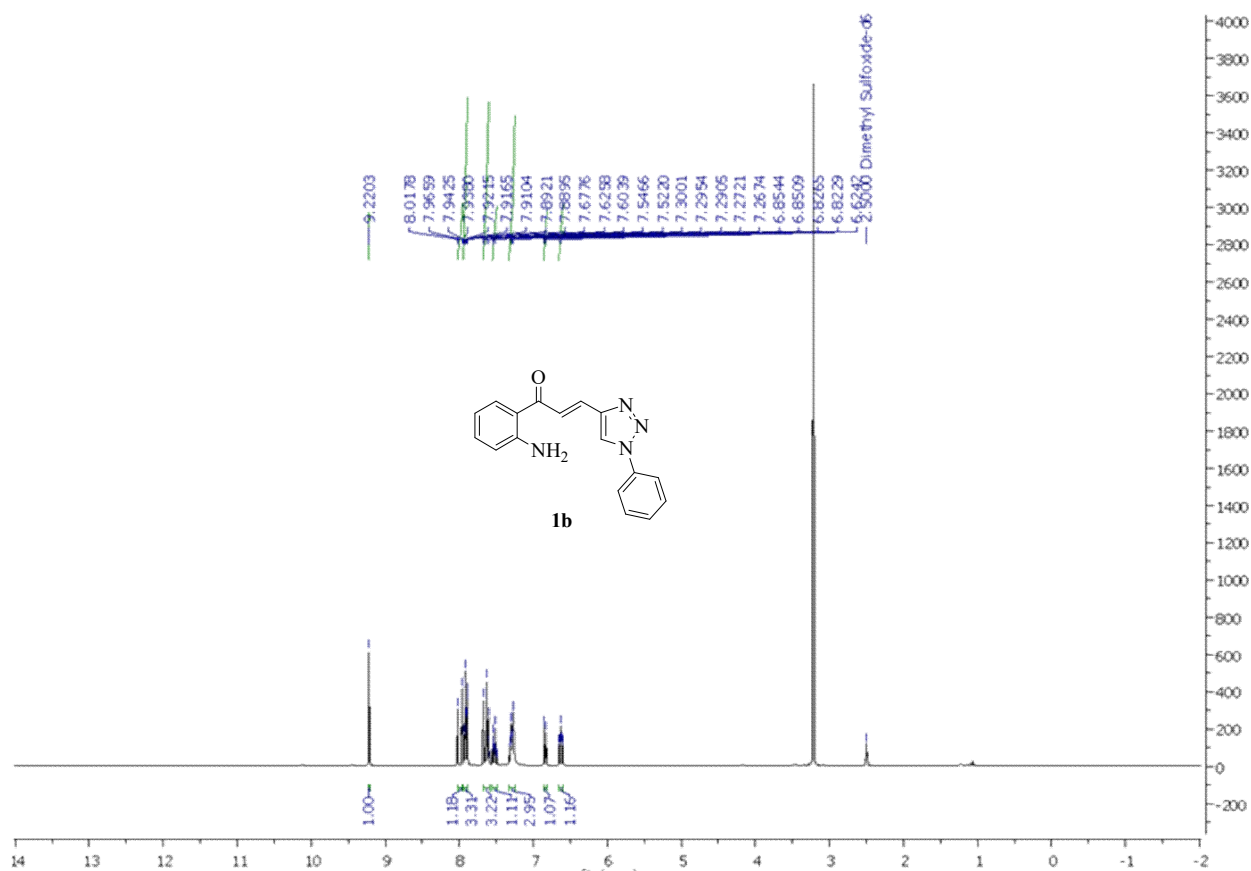

Figure S23. Expanded  $^1\text{H}$  NMR (300 MHz, DMSO- $d_6$ ) of compound 1b

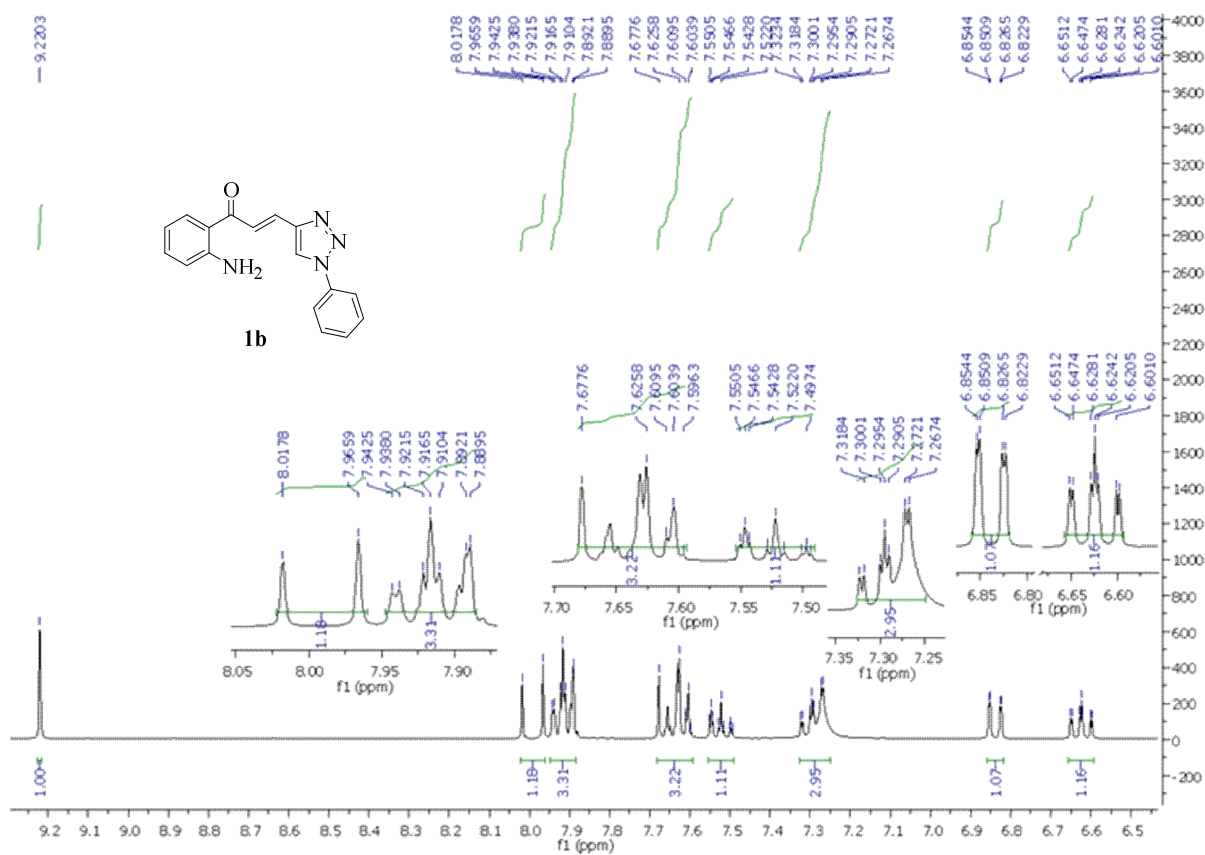

Figure S24.  $^{13}\text{C}$  NMR/APT (75 MHz, DMSO- $d_6$ ) of compound 1b

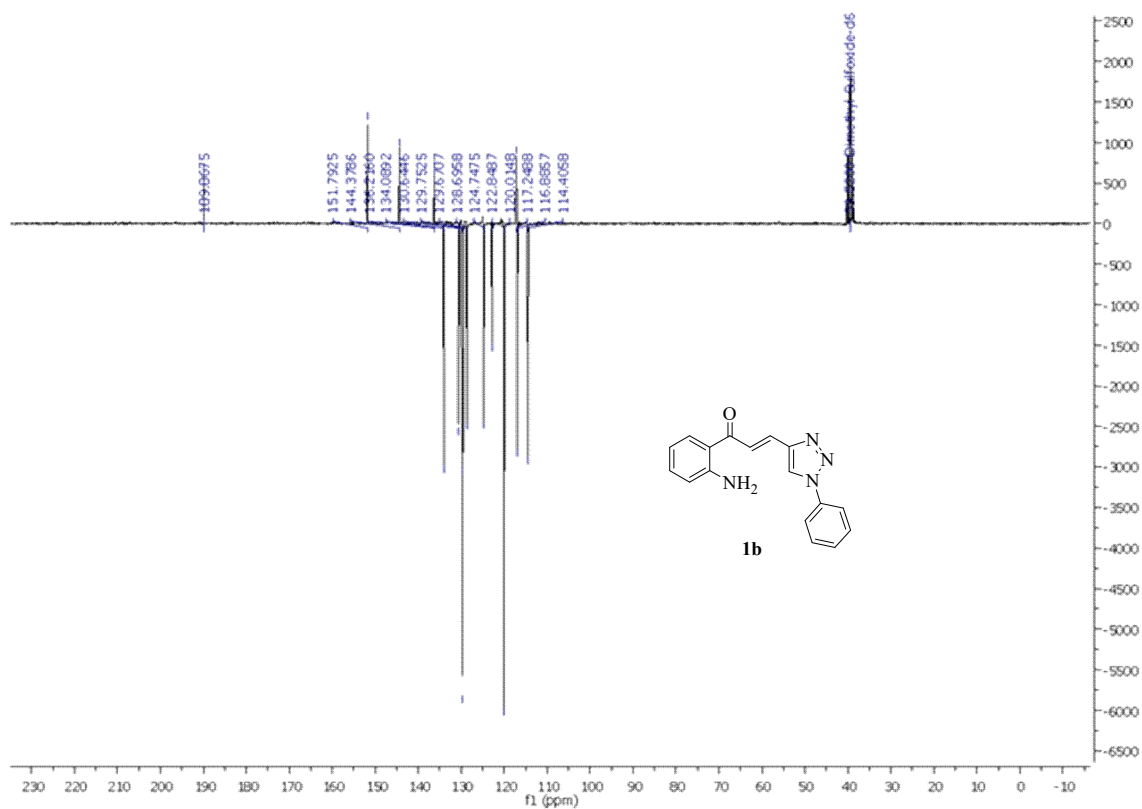

Figure S25. Expanded  $^{13}\text{C}$  NMR/APT (75 MHz, DMSO- $d_6$ ) of compound **1b**

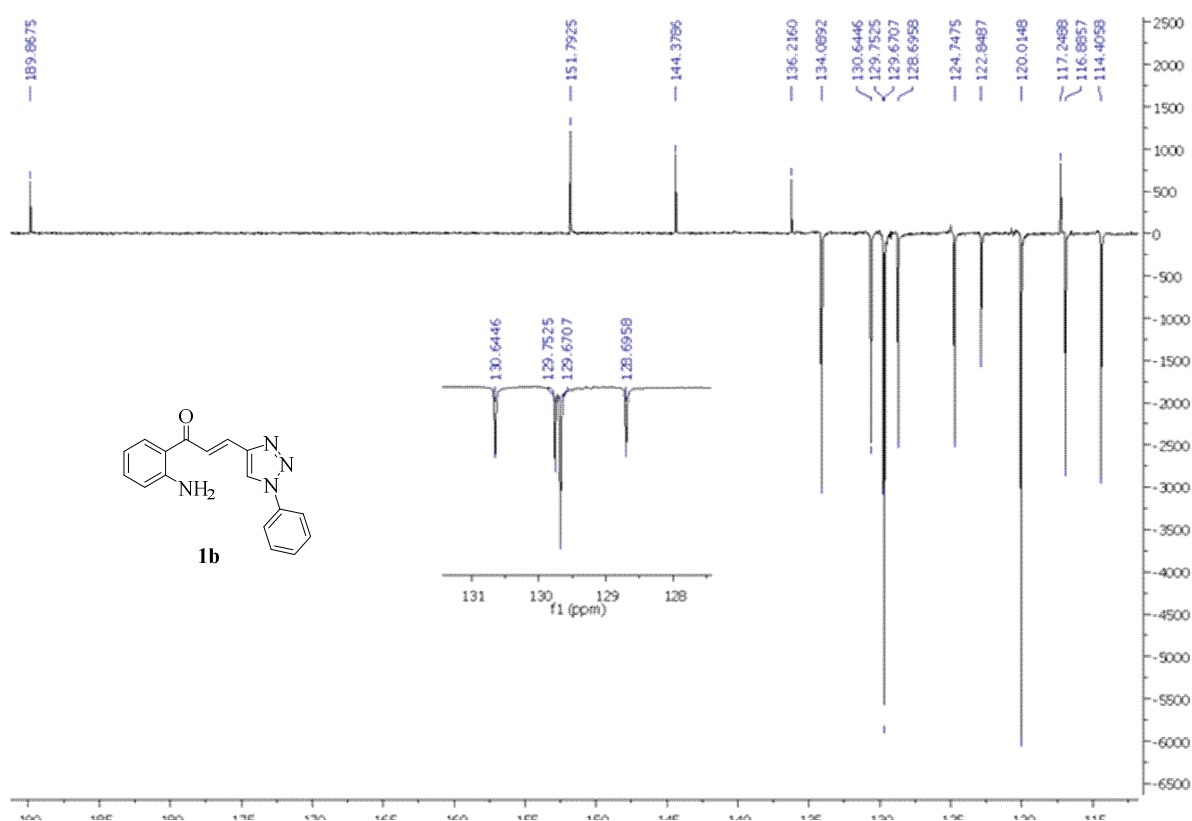

Figure S26. HSQC (DMSO-d6) of compound 1b

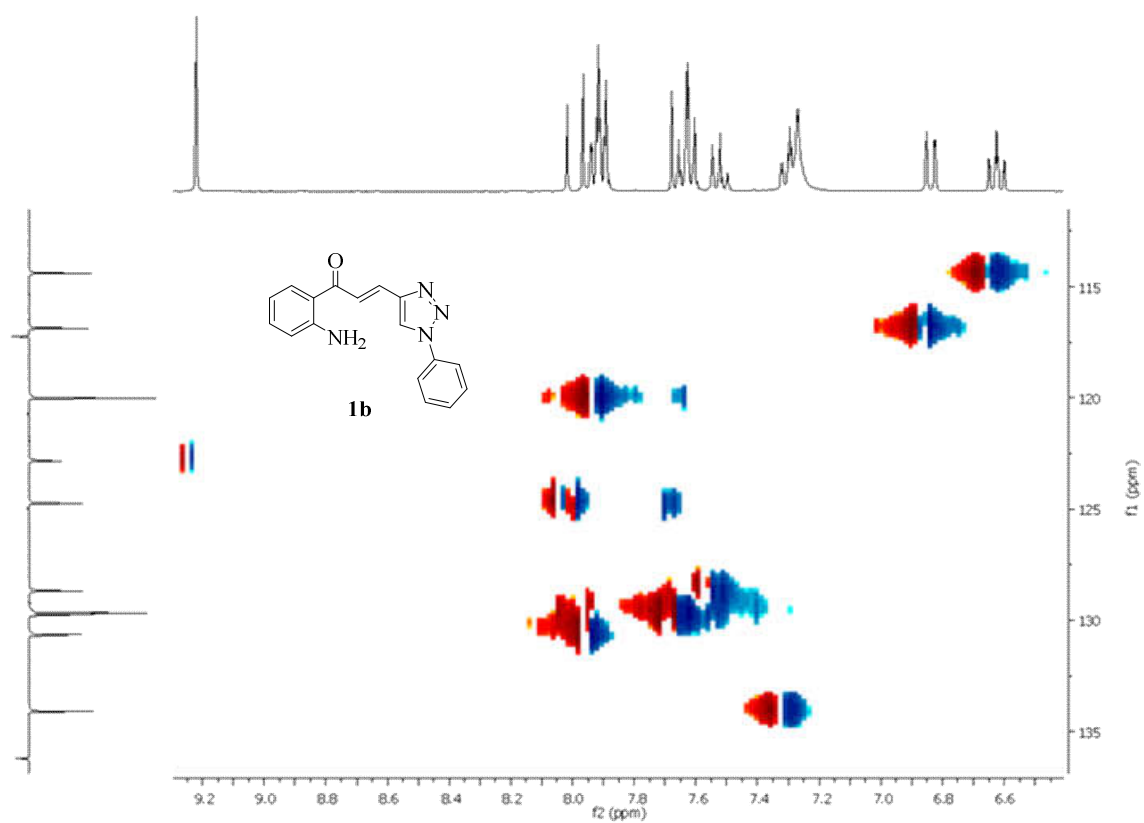

**Figure S27. Expanded HSQC (DMSO-d<sub>6</sub>) of compound 1b**

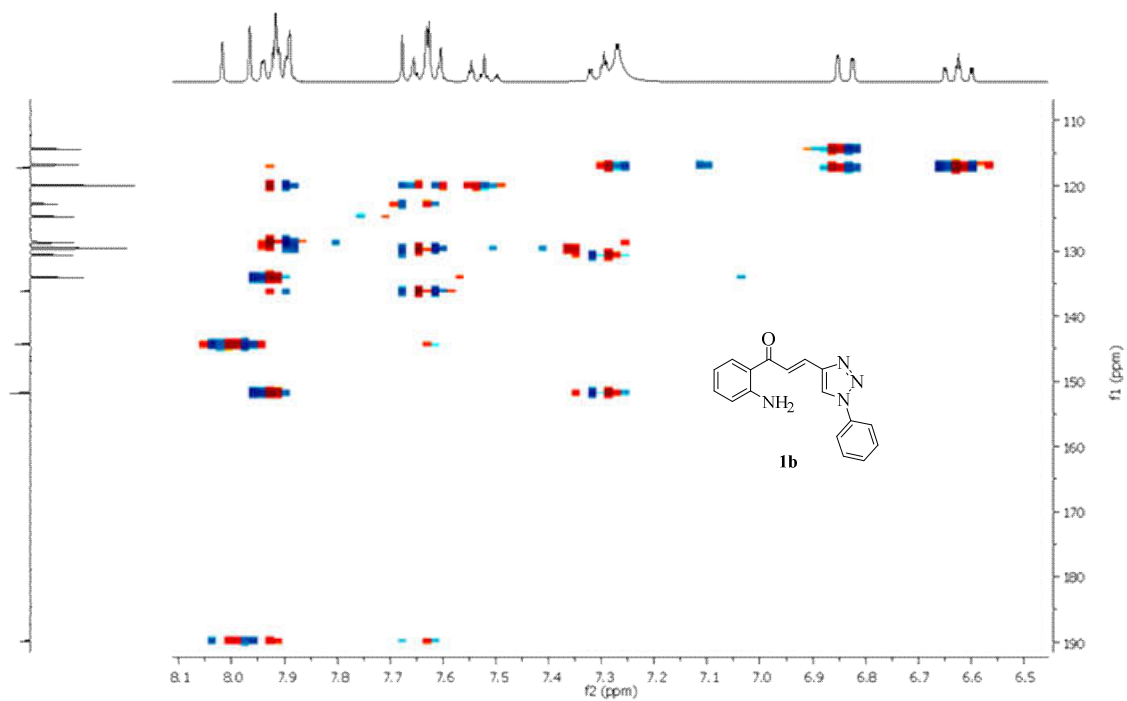

Figure S28. IR (KBr) of compound 1c

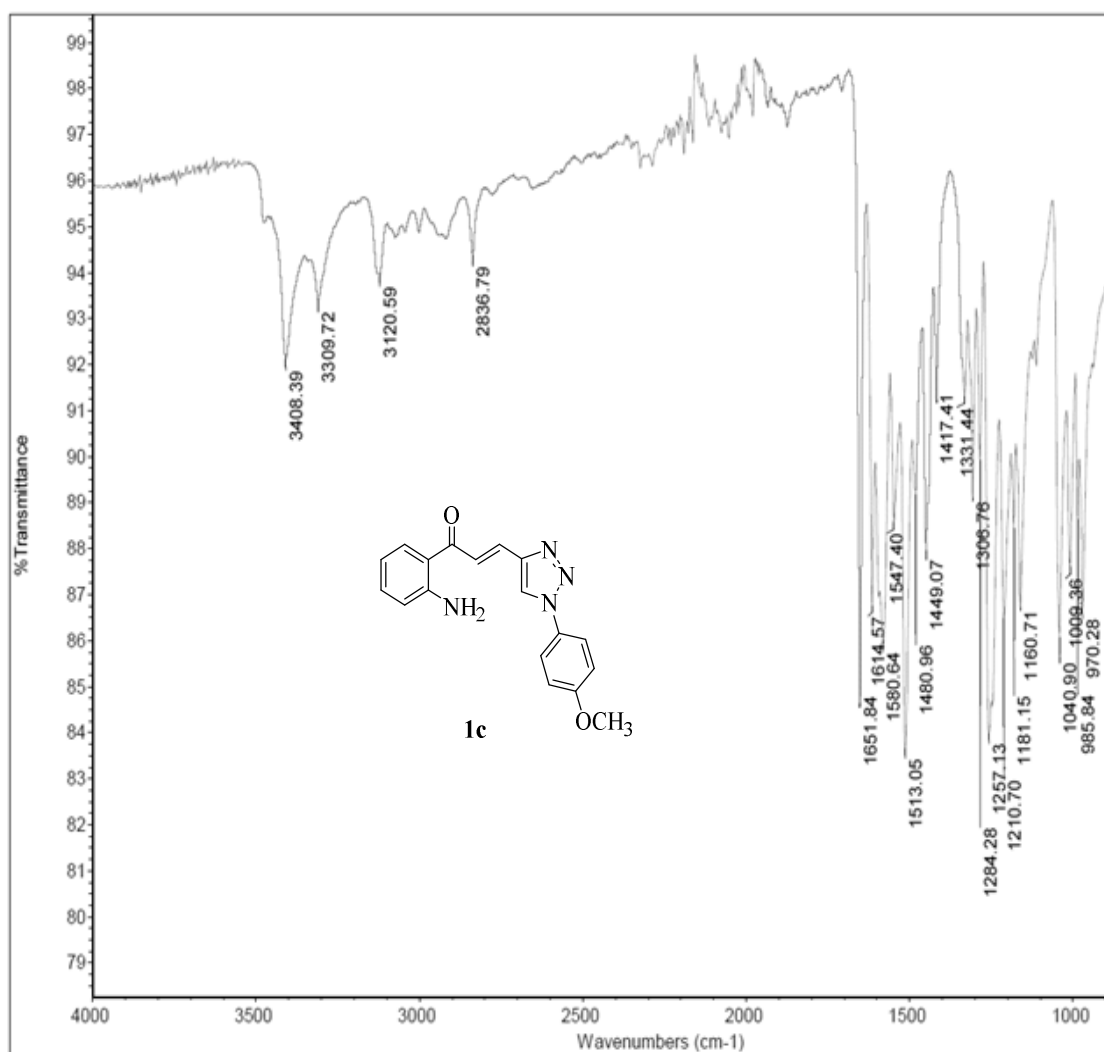

Figure S29.  $^1\text{H}$  NMR (300 MHz, DMSO- $d_6$ ) of compound **1c**

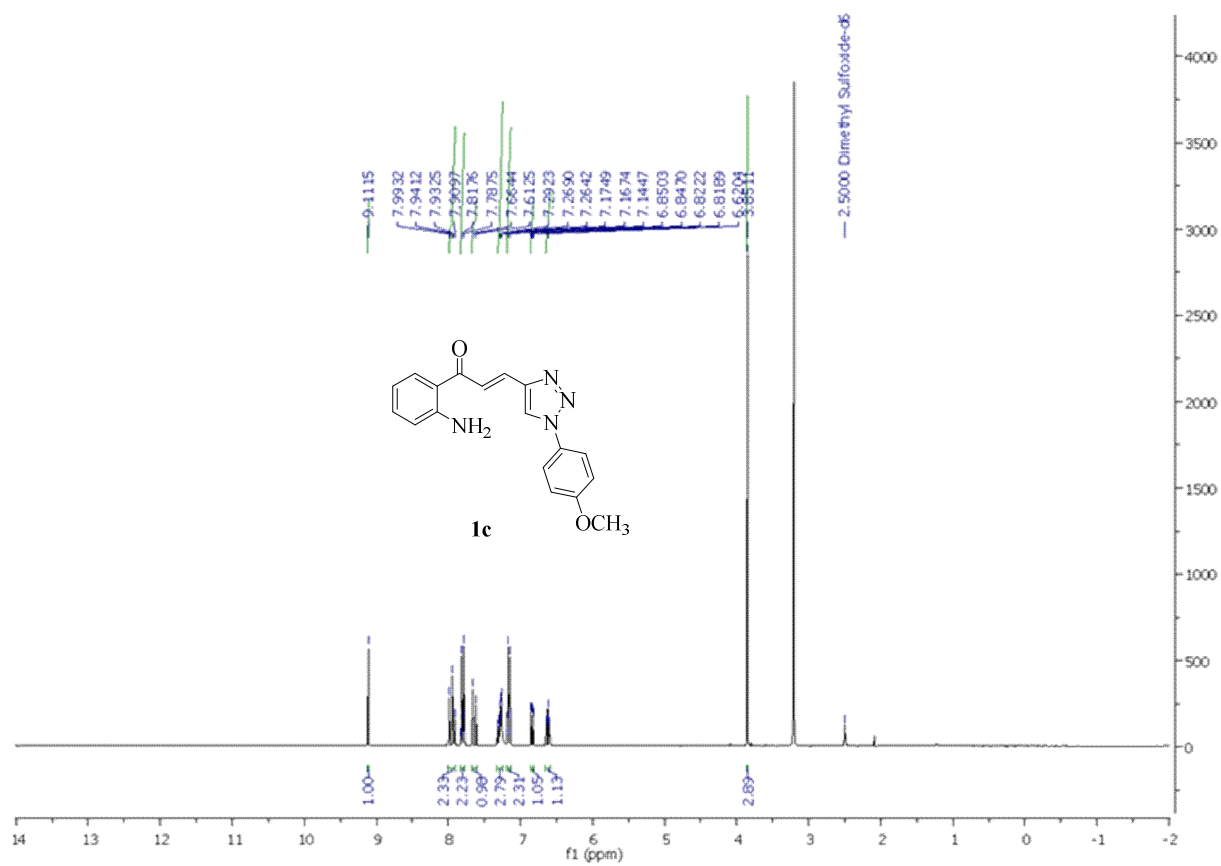



Figure S30. Expanded  $^1\text{H}$  NMR (300 MHz, DMSO- $d_6$ ) of compound **1c**

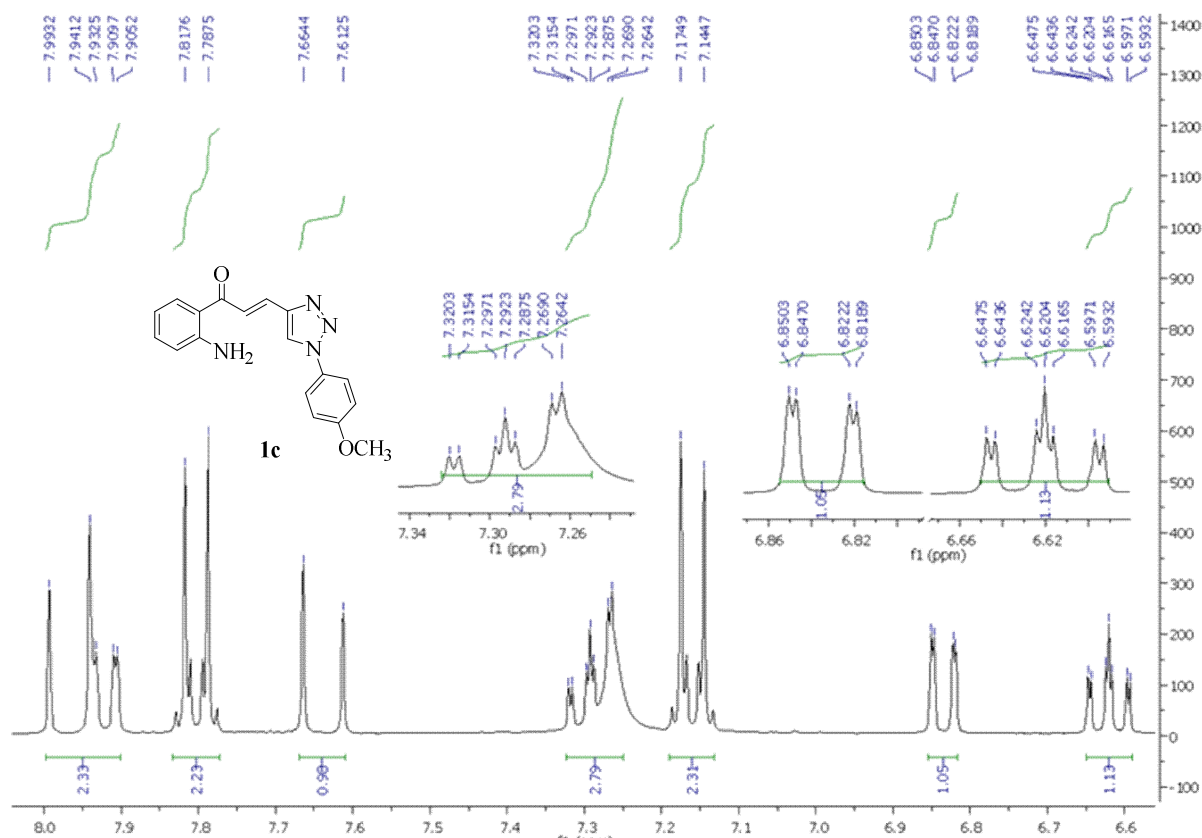

Figure S31.  $^{13}\text{C}$  NMR/APT (75 MHz, DMSO- $d_6$ ) of compound **1c**

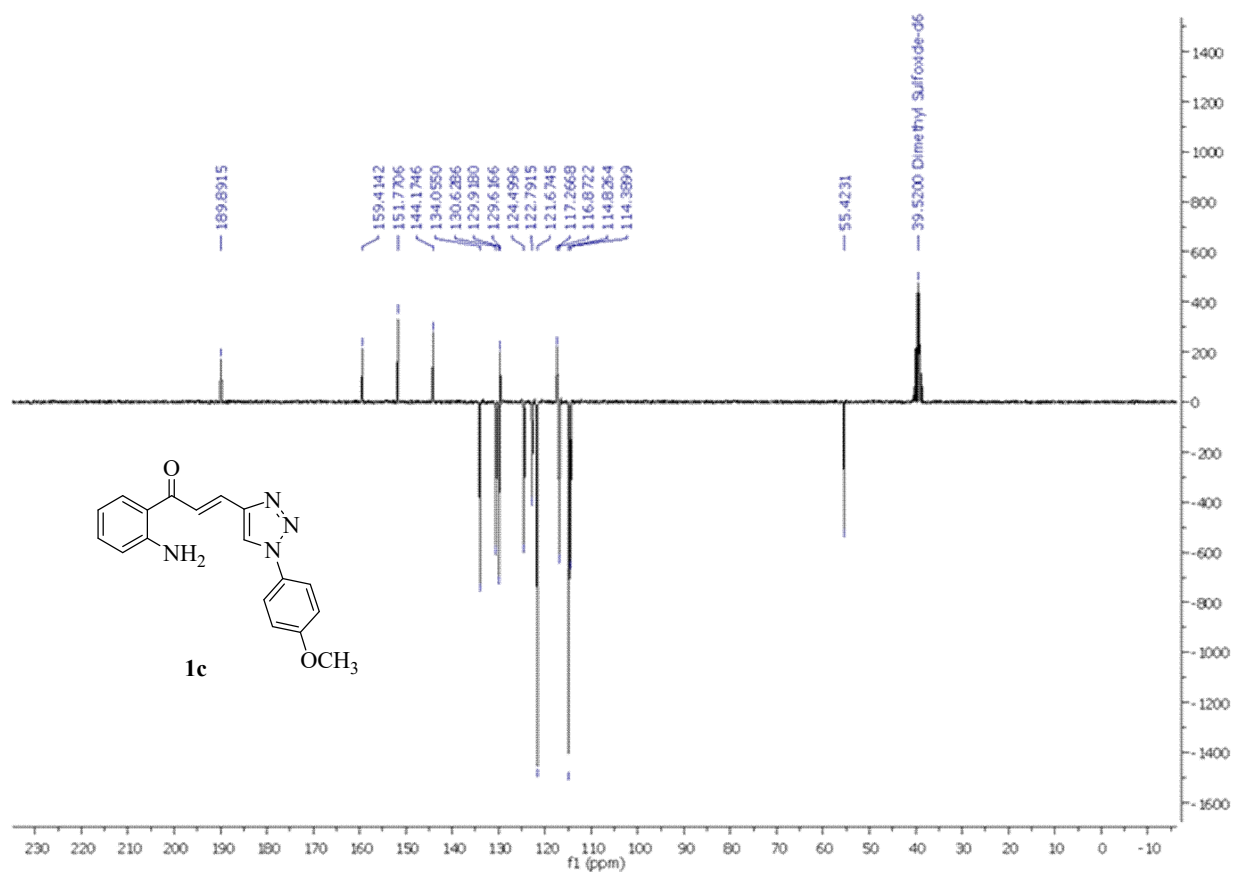

Figure S32. Expanded  $^{13}\text{C}$  NMR/APT (75 MHz, DMSO- $d_6$ ) of compound 1c

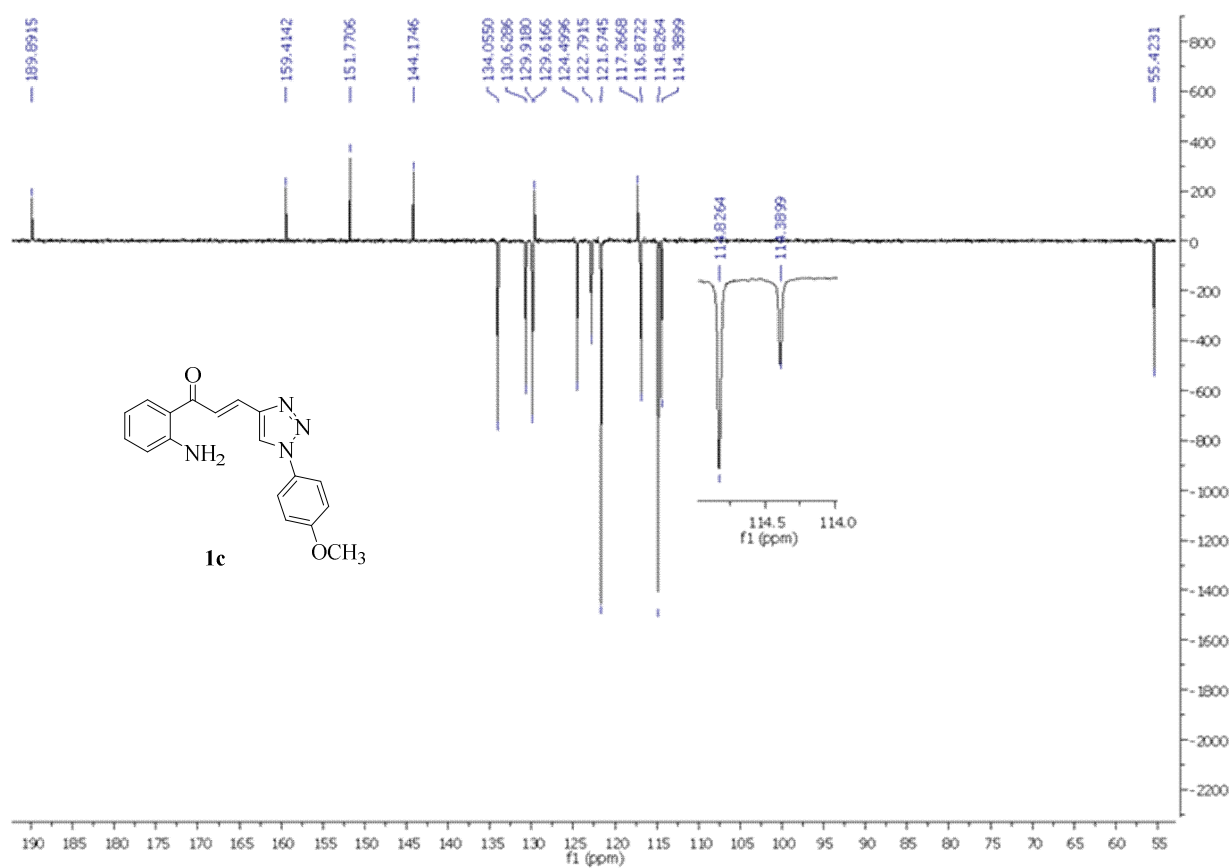

Figure S33. IR (KBr) of compound 1d

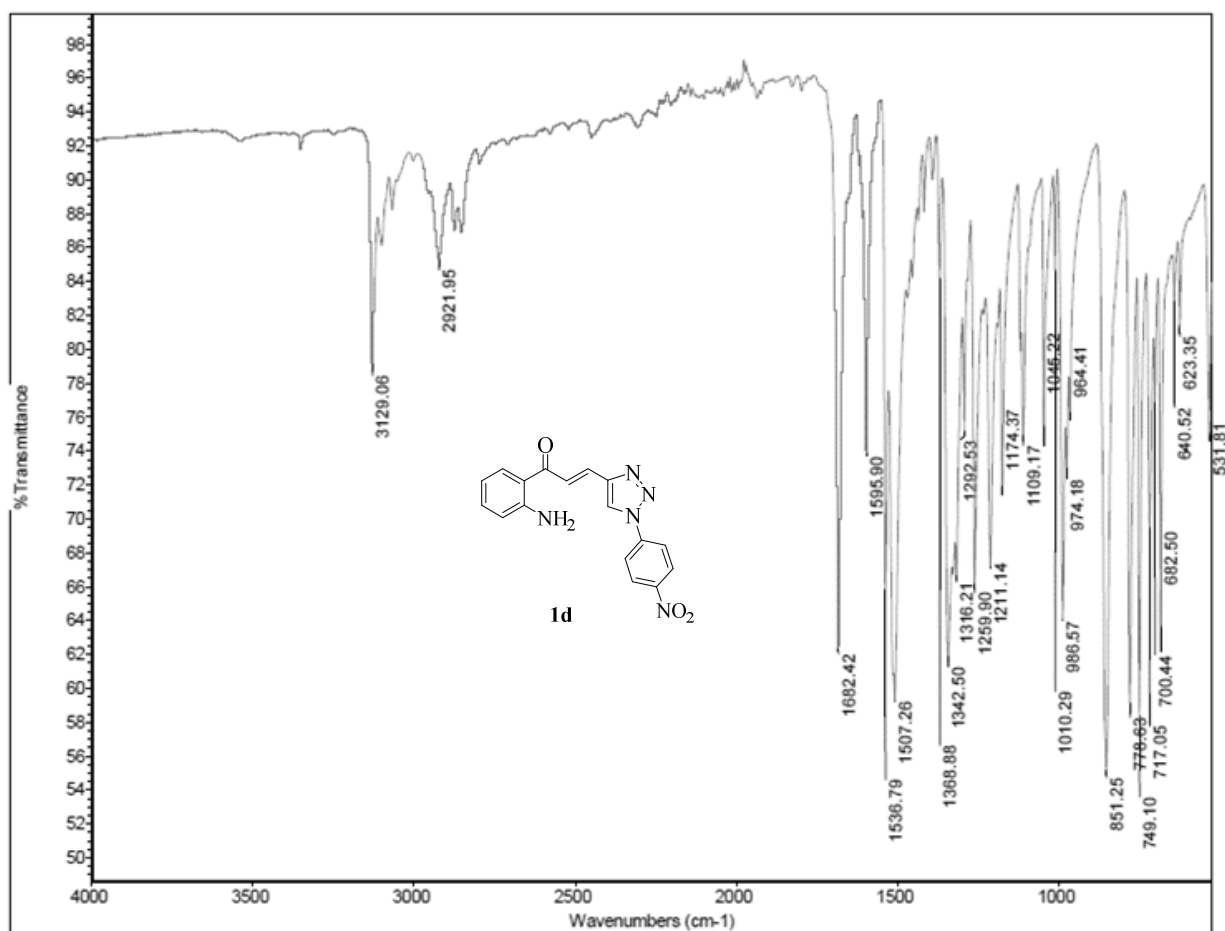

Figure S34.  $^1\text{H}$  NMR (500 MHz, DMSO- $d_6$ ) of compound **1d**

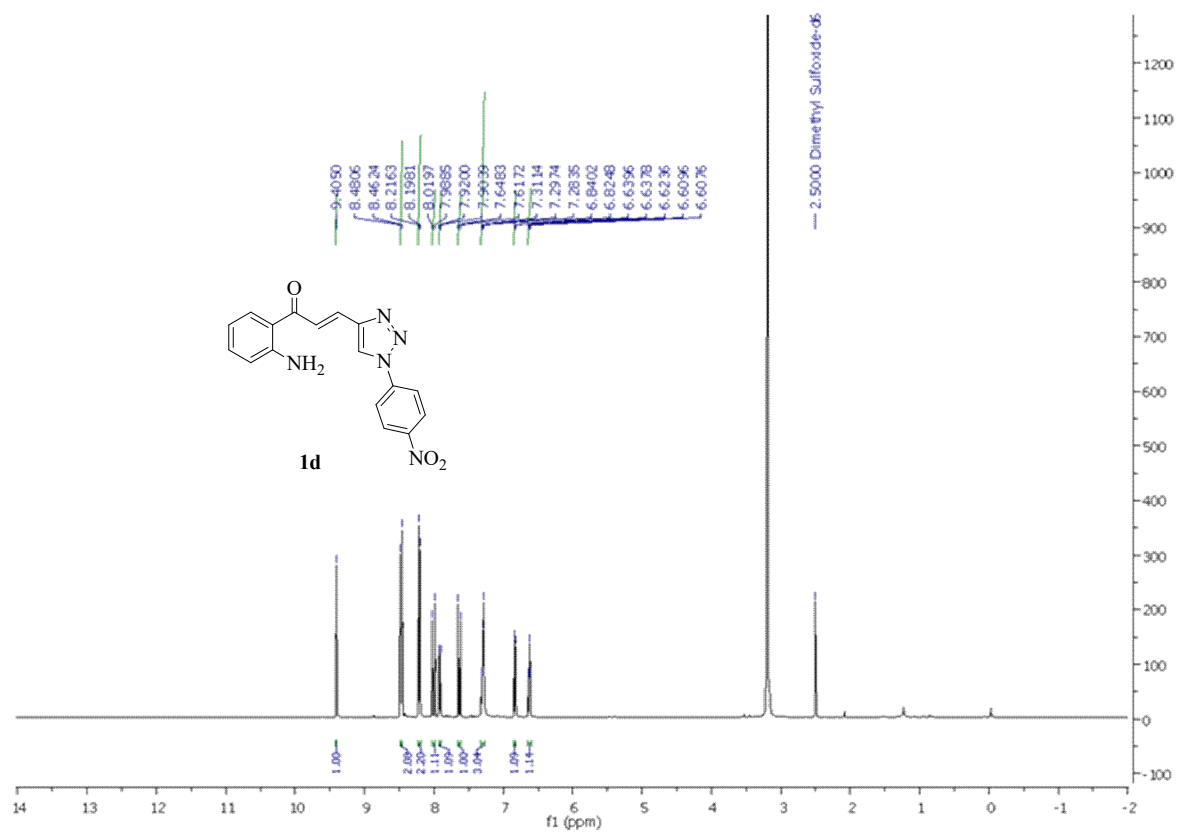

Figure S35. Expanded  $^1\text{H}$  NMR (500 MHz, DMSO- $d_6$ ) of compound **1d**

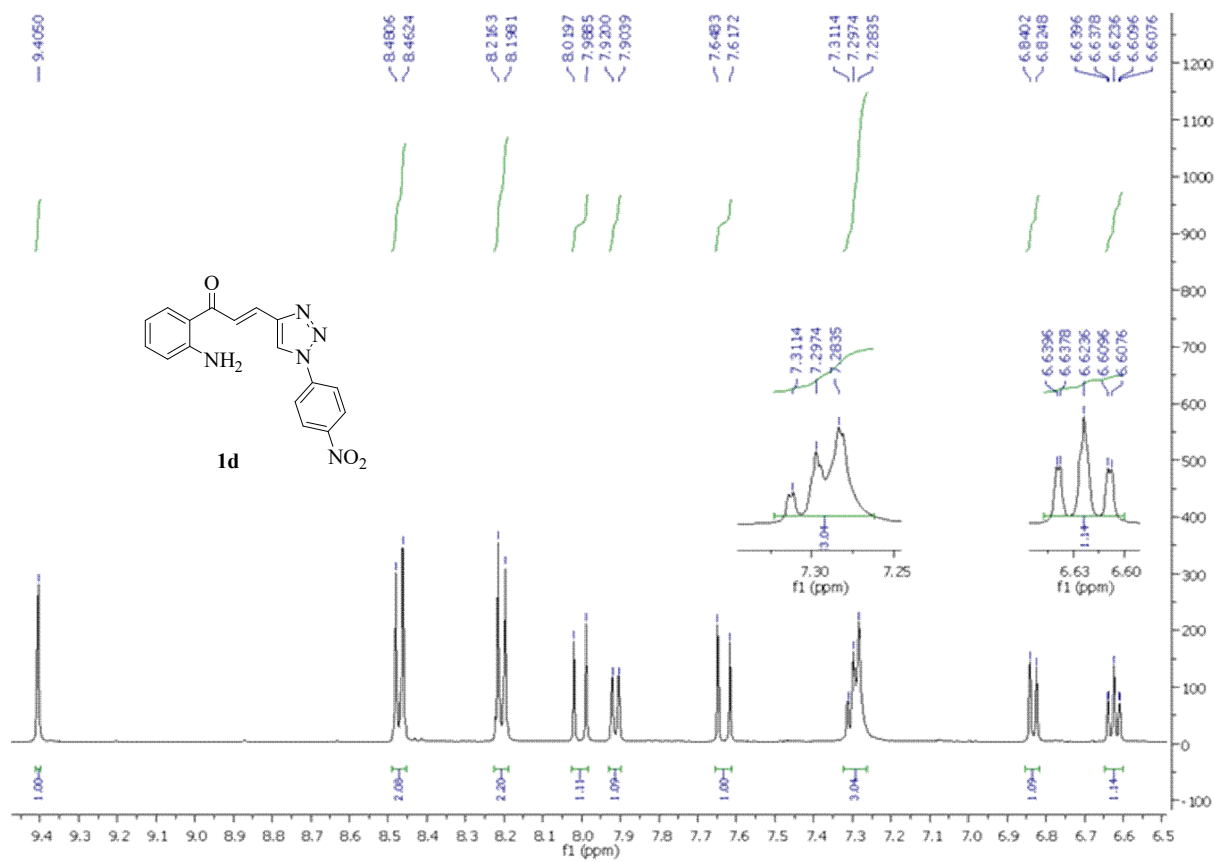

Figure S36.  $^{13}\text{C}$  NMR/APT (125 MHz, DMSO- $d_6$ ) of compound **1d**

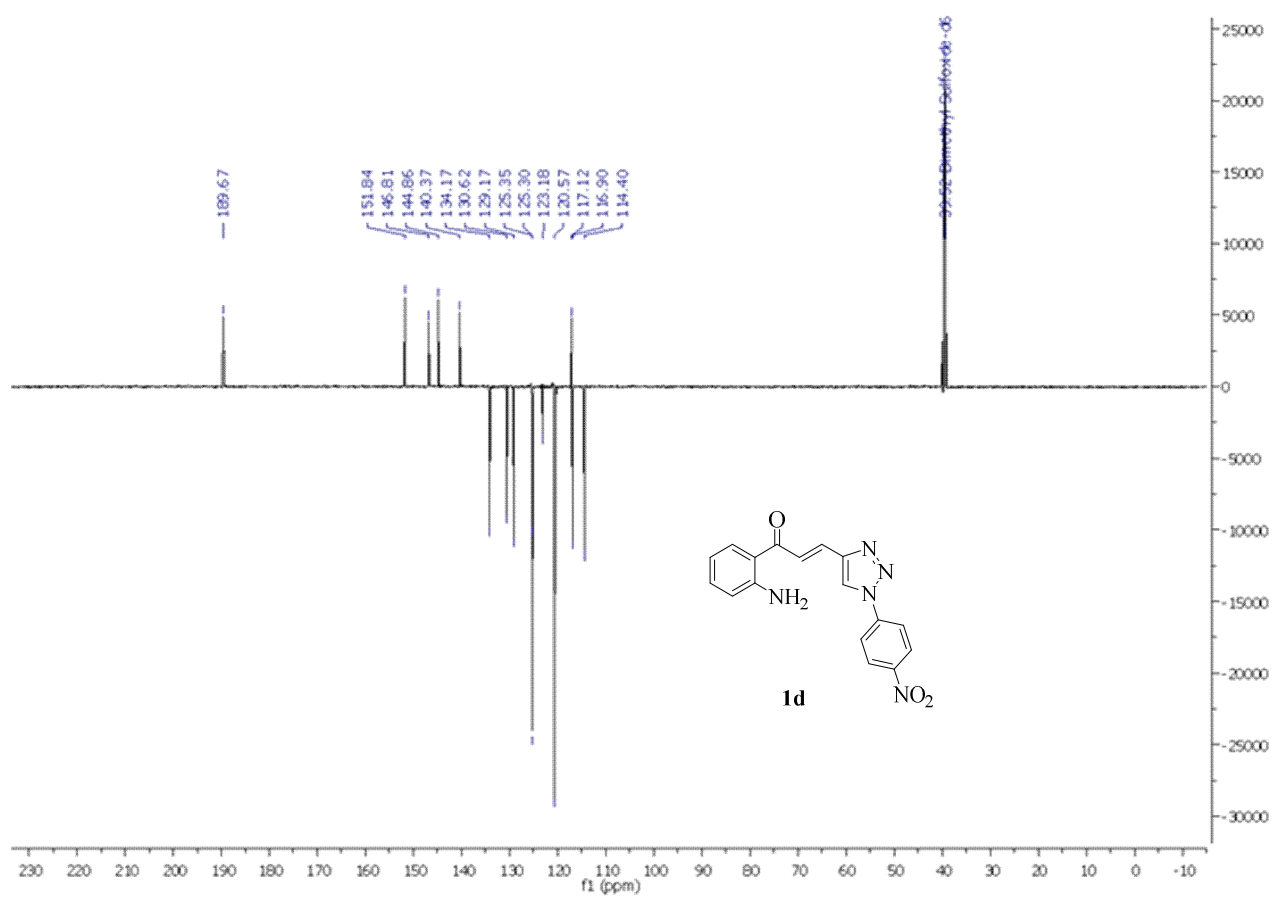

Figure S37. Expanded  $^{13}\text{C}$  NMR/APT (75 MHz, DMSO- $d_6$ ) of compound **1d**

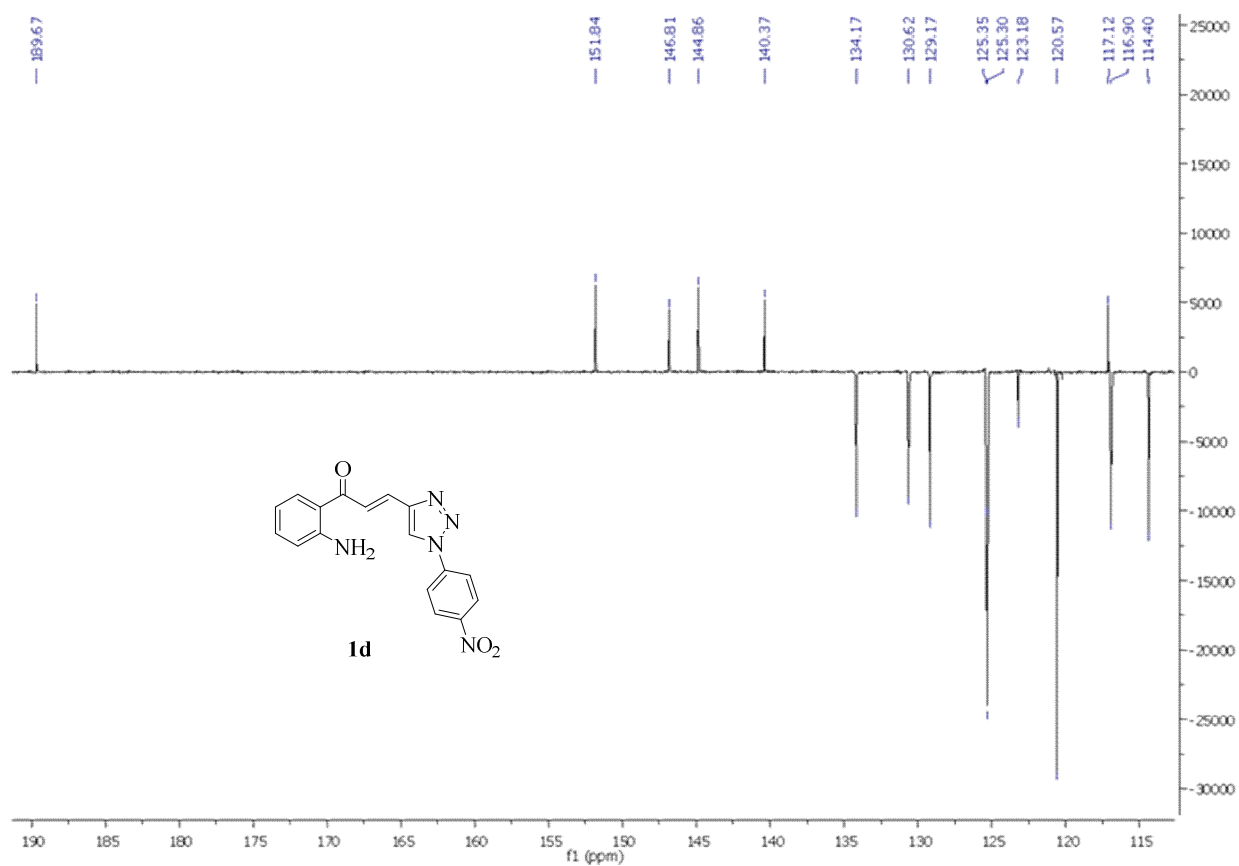



Figure S38. IR (KBr) of compound **1e**

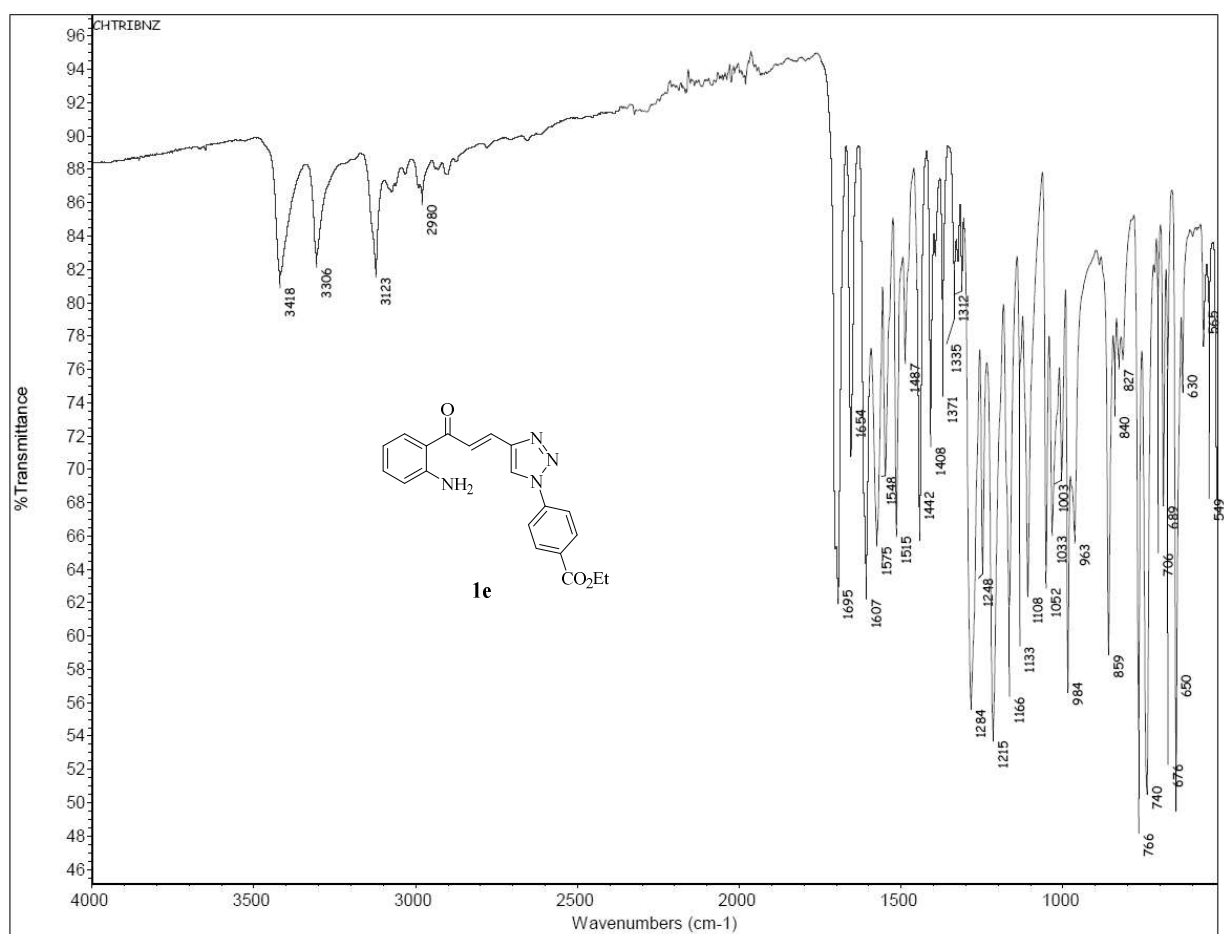

Figure S39.  $^1\text{H}$  NMR (500 MHz, DMSO- $d_6$ ) of compound **1e**

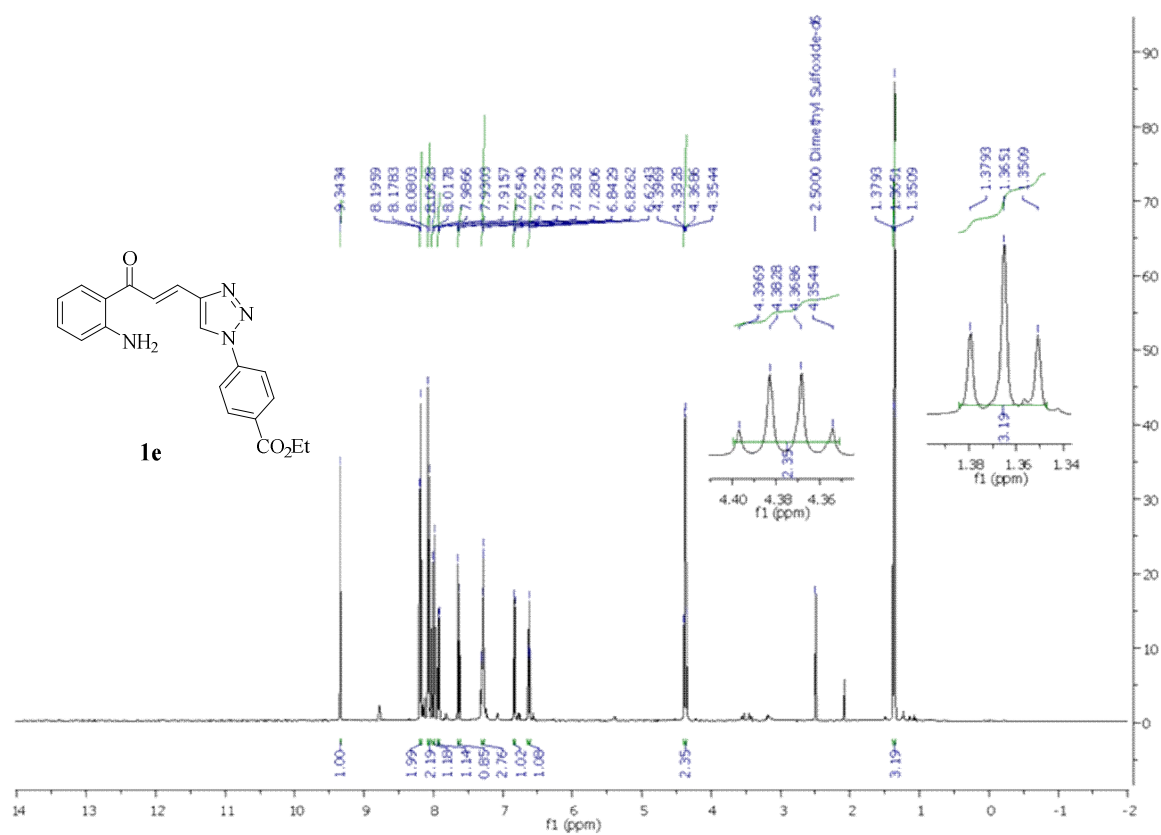

Figure S40. Expanded  $^1\text{H}$  NMR (500 MHz, DMSO- $d_6$ ) of compound **1e**

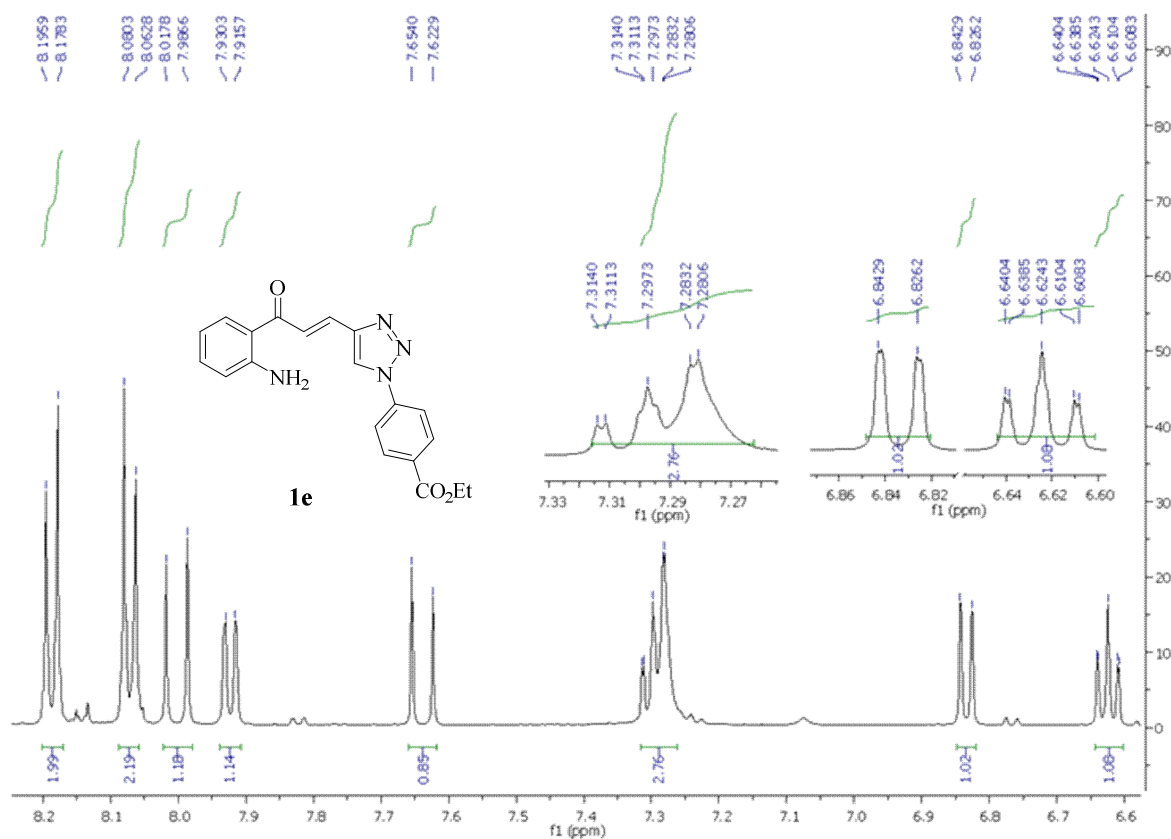

Figure S41.  $^{13}\text{C}$  NMR/APT (125 MHz, DMSO- $d_6$ ) of compound **1e**

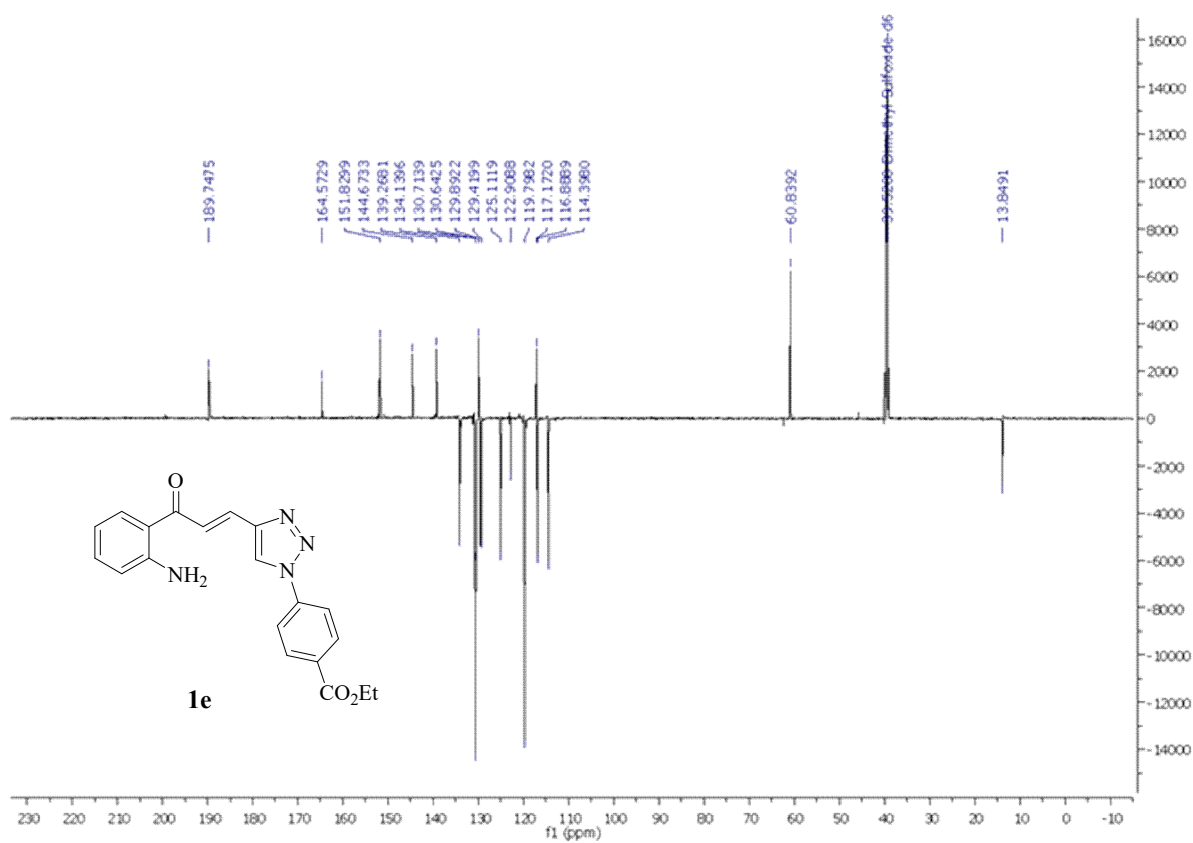

Figure S42. Expanded  $^{13}\text{C}$  NMR/APT (125 MHz, DMSO- $d_6$ ) of compound **1e**

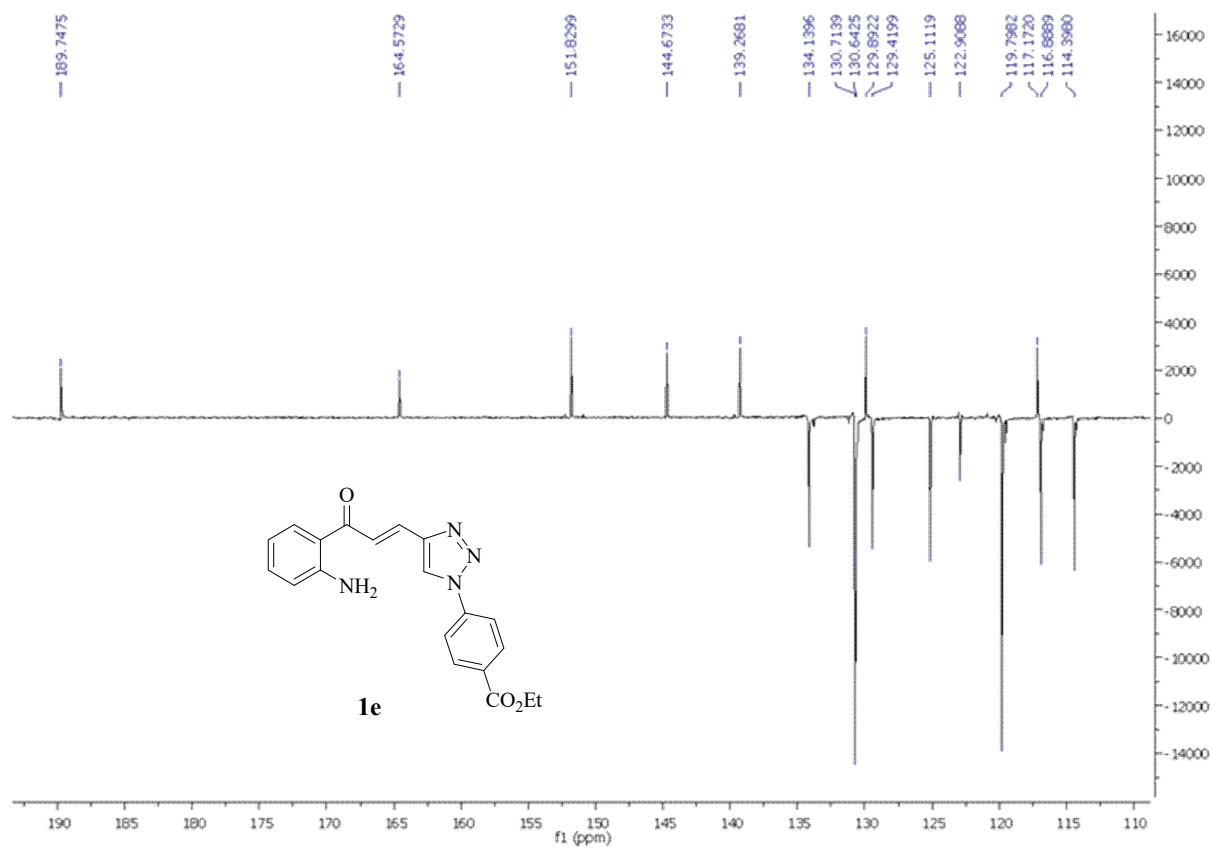

Figure S43. IR (KBr) of compound 1f

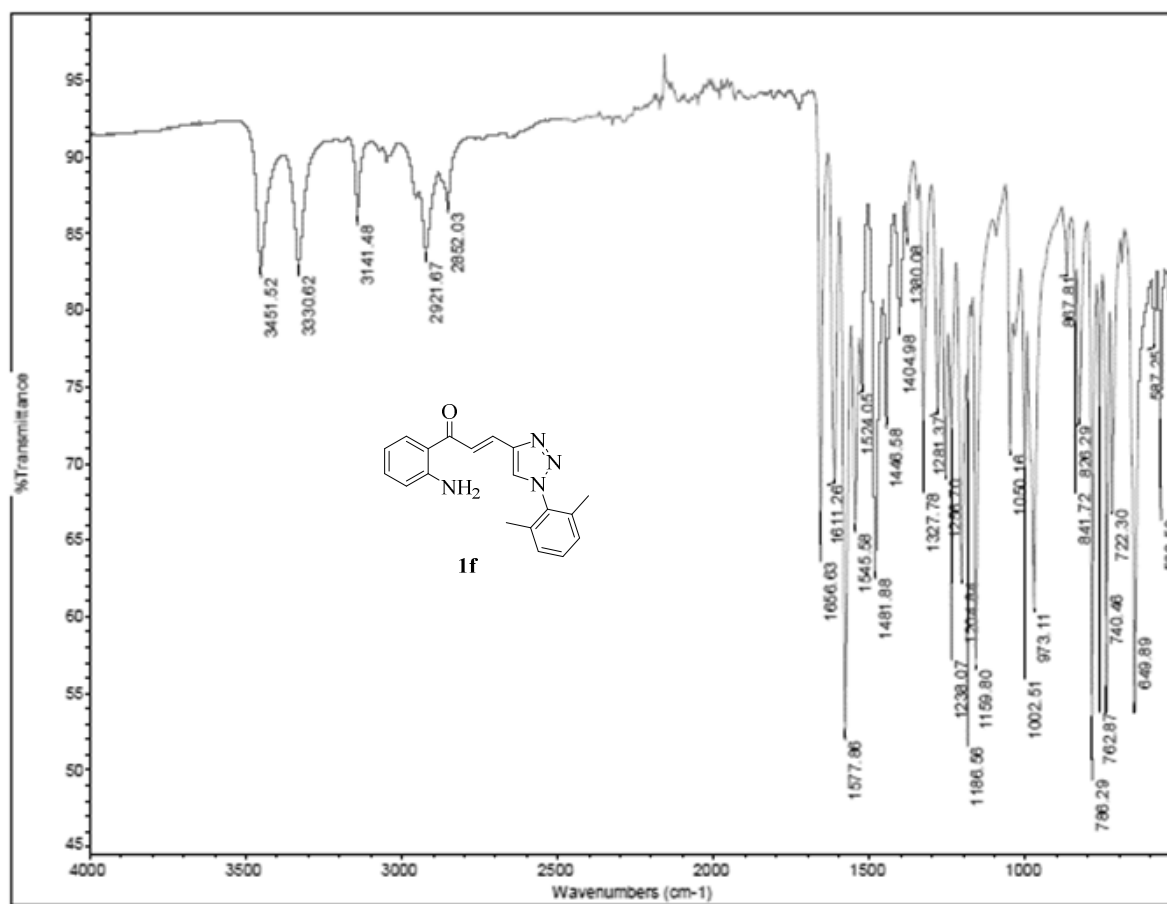

Figure S44.  $^1\text{H}$  NMR (500 MHz, DMSO- $d_6$ ) of compound 1f

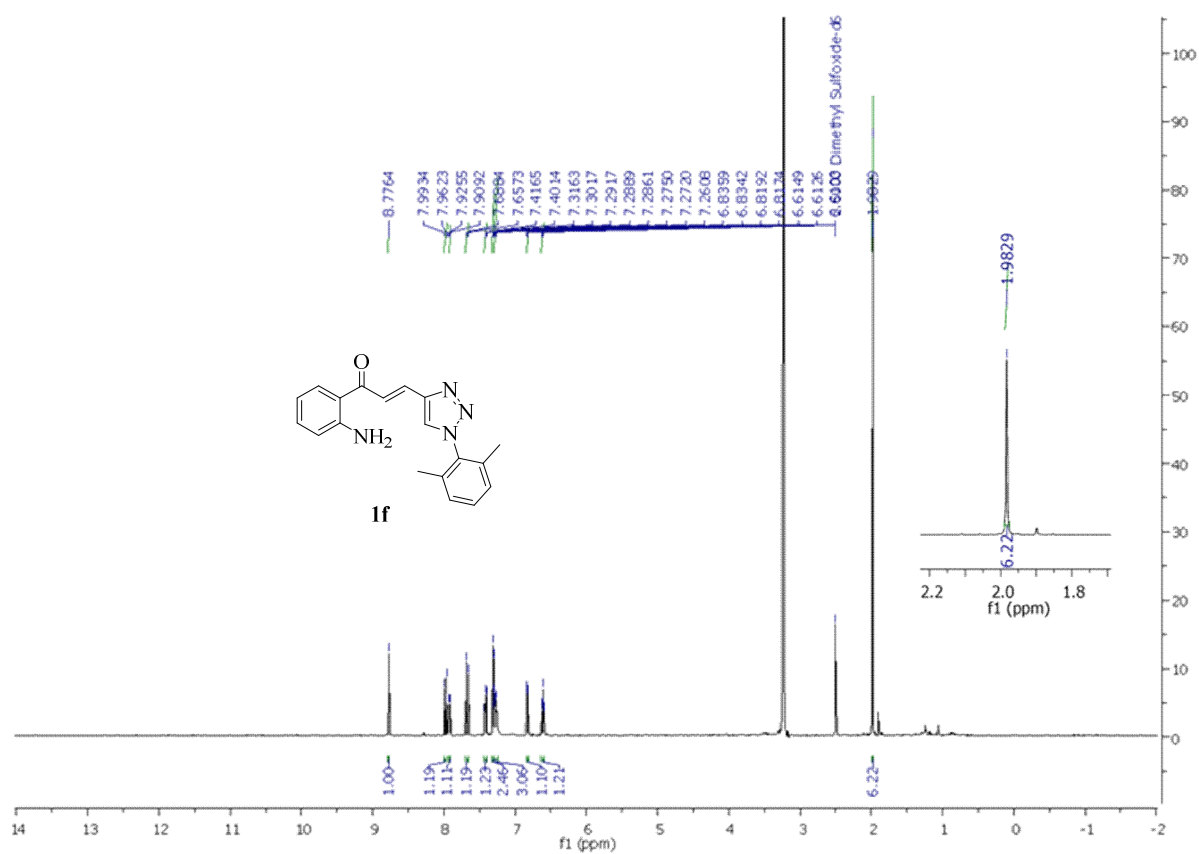

Figure S45. Expanded  $^1\text{H}$  NMR (500 MHz, DMSO- $d_6$ ) of compound 1f

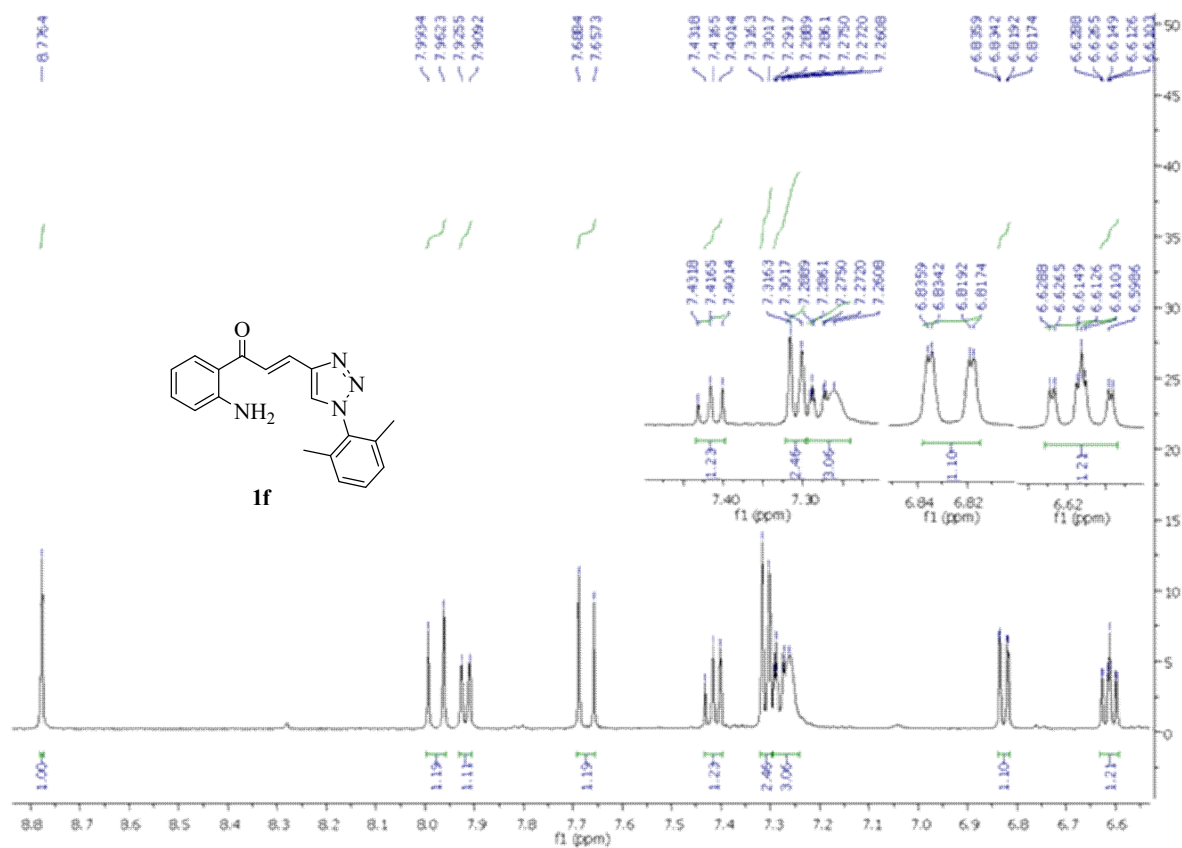



**Figure S46. COSY (DMSO-d6) of compound 1f**

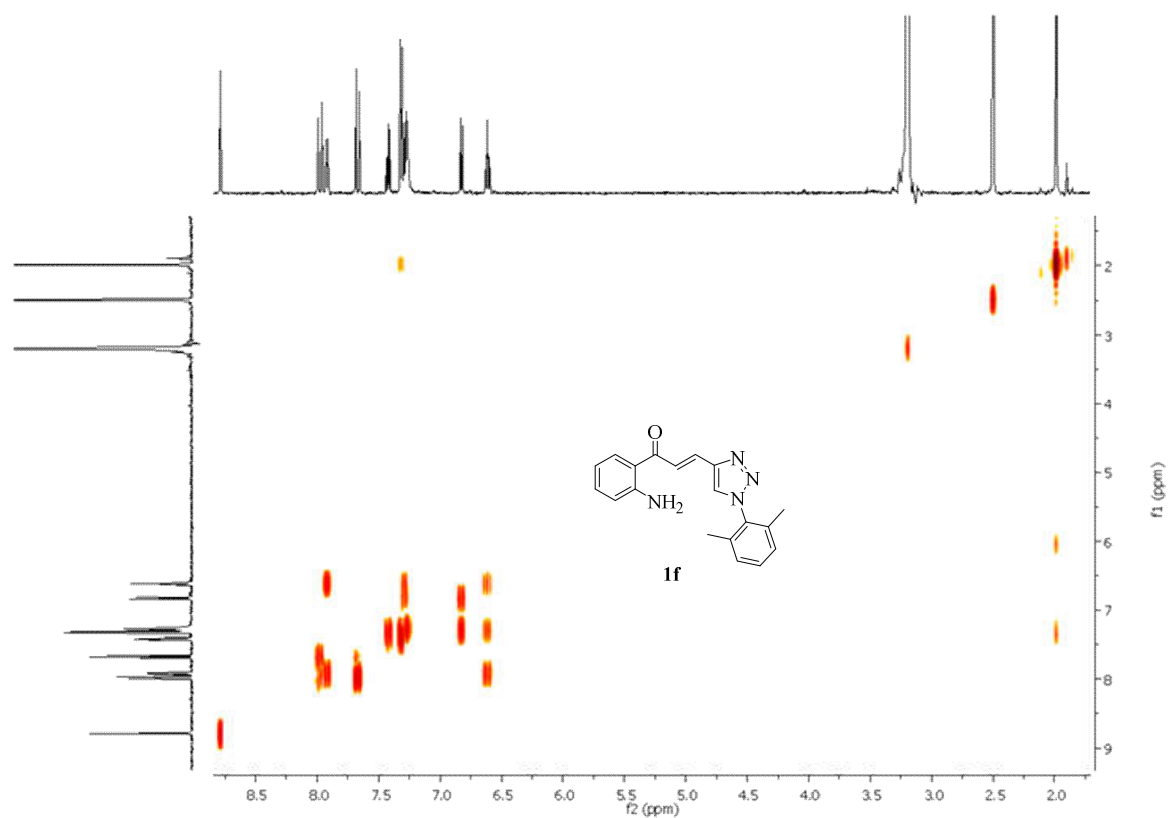

Figure S47.  $^{13}\text{C}$  NMR/APT (125 MHz, DMSO- $d_6$ ) of compound 1f

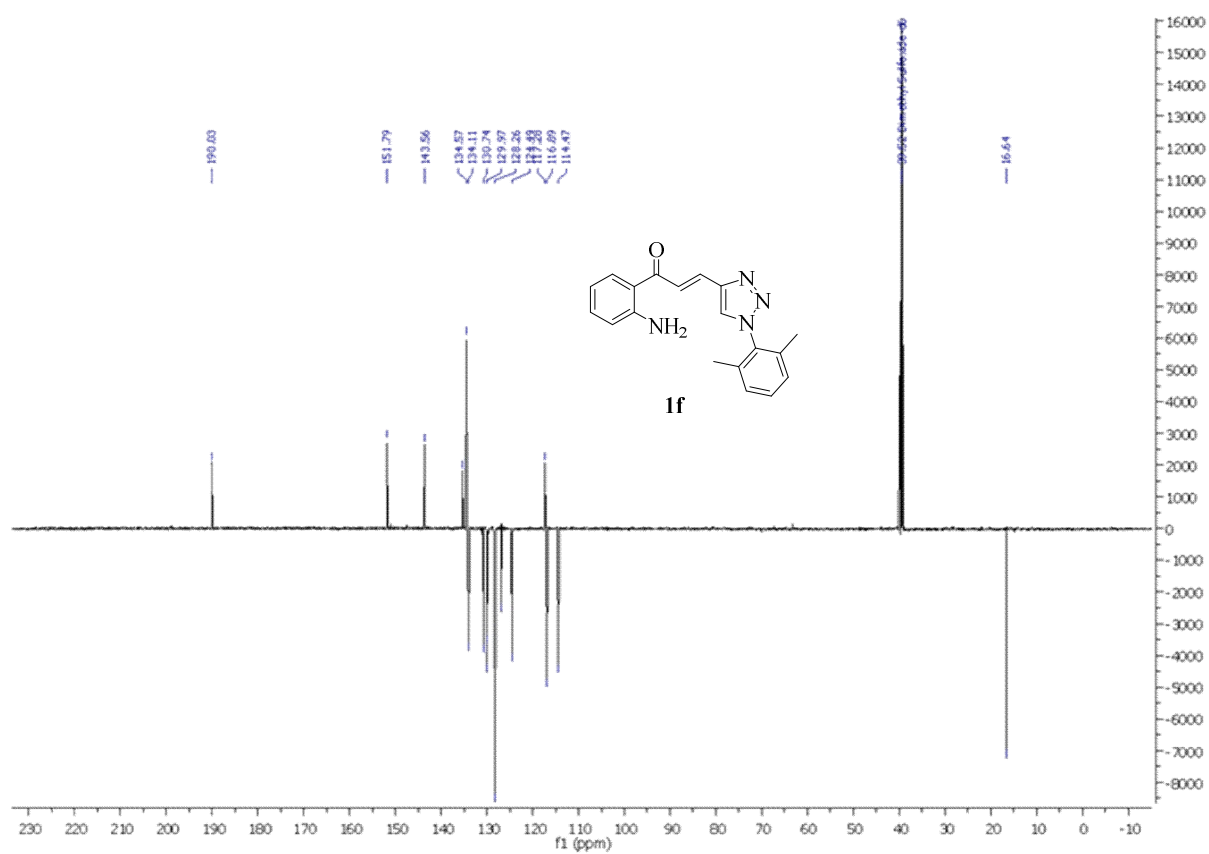

Figure S48. Expanded  $^{13}\text{C}$  NMR/APT (125 MHz, DMSO- $d_6$ ) of compound 1f

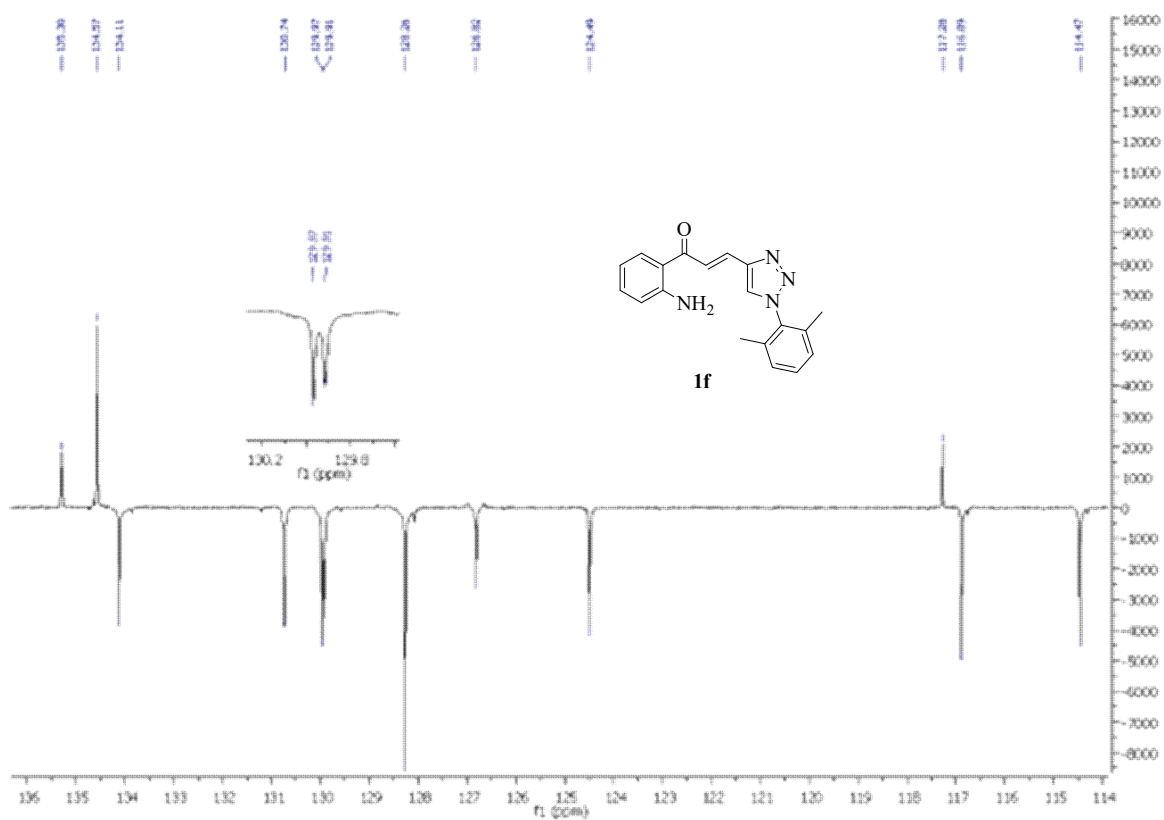

**Figure S49. HSQC (DMSO-d6) of compound 1f**

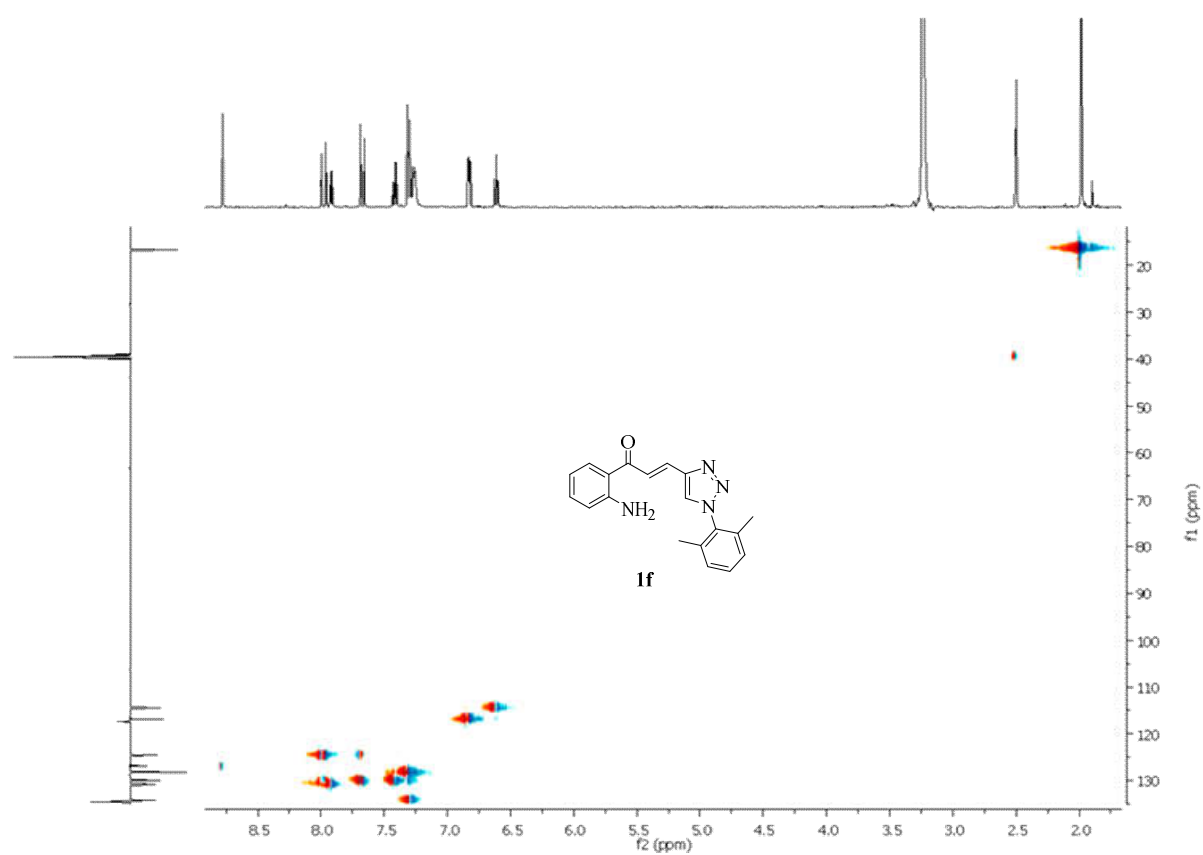

**Figure S50. Expanded HSQC (DMSO-d6) of compound 1f**

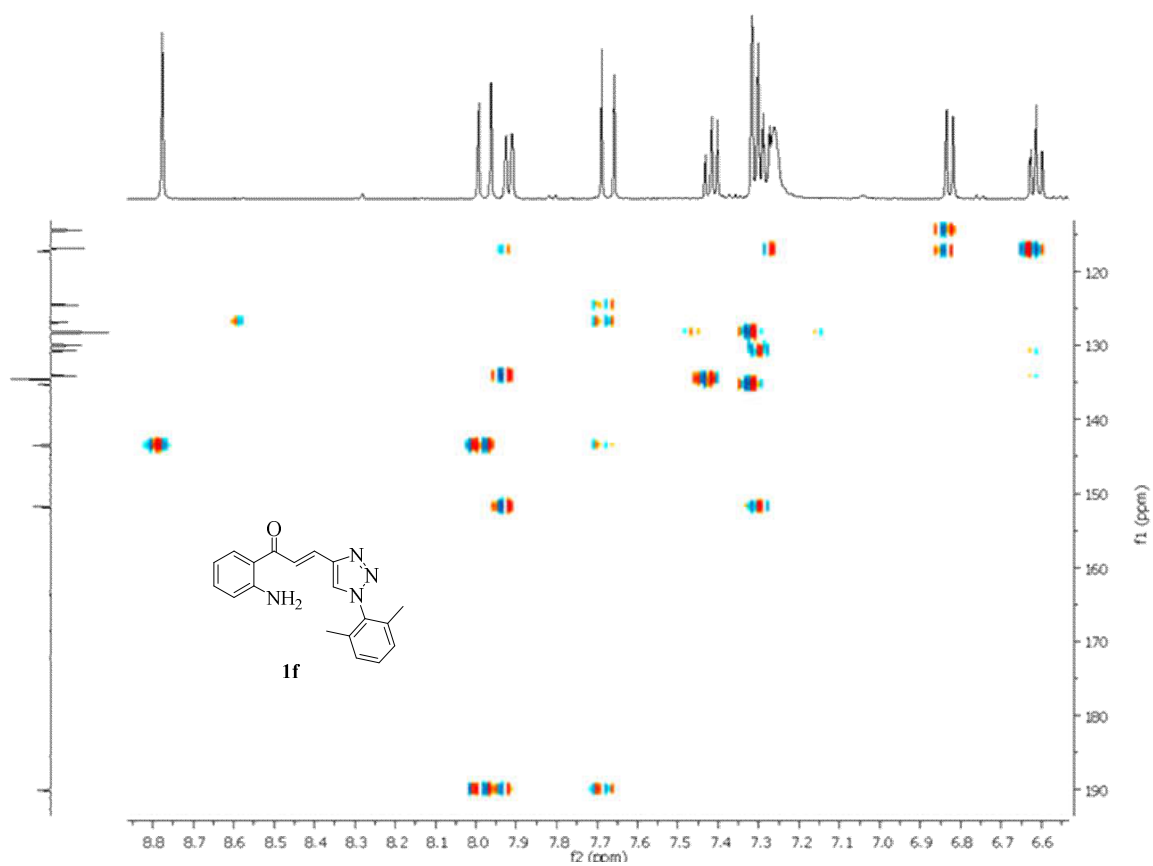

Supplement: s1 [file s1]
